# Supplementary material for: Eupatorin and Salviandulin-A, with Antimicrobial and Anti-Inflammatory Effects from Salvia lavanduloides Kunth Leaves
Source: MDPI journal article supplement (doi:10.3390/plants11131739), 2022-06-30
Supplement: s1 [file s1]

# Eupatorin and salviandulin-A, with antimicrobial and anti-inflammatory effect of *Salvia lavanduloides* Kunth leaves

Manasés González-Cortazar <sup>1</sup>, David Osvaldo Salinas-Sánchez <sup>2,3,\*</sup>, Maribel Herrera-Ruiz <sup>1</sup>,  
Dionisio Celerino Román-Ramos <sup>3</sup>, Alejandro Zamilpa <sup>1</sup>, Enrique Jiménez-Ferrer <sup>1</sup>, Ever A. Ble-González <sup>4</sup>,  
Patricia Álvarez-Fitz <sup>5</sup>, Ricardo Castrejón-Salgado <sup>6</sup> and Ma. Dolores Pérez-García <sup>1,\*</sup>

- <sup>1</sup> Centro de Investigación Biomédica del Sur, Instituto Mexicano del Seguro Social, Argentina No. 1, Col. Centro, Xochitepec 62790, Morelos, Mexico; gmanases2000@gmail.com (M.G.-C.); edanae10@yahoo.com.mx (M.H.-R.); azamilpa\_2000@yahoo.com.mx (A.Z.); enriqueferrer\_mx@yahoo.com (E.J.-F.)
  - <sup>2</sup> Centro de Investigación en Biodiversidad y Conservación (CIByC), Universidad Autónoma del Estado de Morelos (UAEM), Av. Universidad 1001, Col. Chamilpa, Cuernavaca 62209, Morelos, Mexico
  - <sup>3</sup> Escuela de Estudios Superiores del Jicarero (EESJ), Universidad Autónoma del Estado de Morelos, Carretera Galeana-Tequesquitengo s/n Col. el Jicarero, Jojutla 62909, Morelos, Mexico; roman.ramos.dionisio@gmail.com
  - <sup>4</sup> División Académica de Ciencias Básicas, Universidad Juárez Autónoma de Tabasco, Carretera Cunduacán-Jalpa Km. 0.5, Cunduacán 86690, Tabasco, Mexico; ble\_49@hotmail.com
  - <sup>5</sup> Laboratorio de Toxicología, Cátedra CONACyT-Universidad Autónoma de Guerrero, Av. Lázaro Cárdenas s/n. Col. La Haciendita, Chilpancingo 39070, Guerrero, Mexico; paty\_fitz@hotmail.com
  - <sup>6</sup> Instituto Mexicano del Seguro Social, Unidad de Medicina Familiar Número 3, Avenida Insurgentes Esquina con Emiliano Zapata s/n., Centro, Jiutepec 62550, Morelos, Mexico; carisal13@hotmail.com
- \* Correspondence: davidos@uaem.mx (D.O.S.-S.); lola\_as@yahoo.com.mx (M.D.P.-G.); Tel.: +52-(777)-3297019 (D.O.S.-S.); +52-(777)-3612155 (M.D.P.-G.)

## Content

- Figure S1.** <sup>1</sup>H NMR (CDCl<sub>3</sub>, 600 MHz) of compound (1)
- Figure S2.** <sup>13</sup>C NMR (CDCl<sub>3</sub>, 150 MHz) of compound (1)
- Figure S3.** <sup>3</sup>C (DEPT) NMR (CDCl<sub>3</sub>, 150 MHz) of compound (1)
- Figure S4.** <sup>1</sup>H-<sup>1</sup>H COSY NMR (CDCl<sub>3</sub>, 600 MHz) of compound (1)
- Figure S5.** <sup>1</sup>H-<sup>13</sup>C (HSQC) NMR (CDCl<sub>3</sub>, 600 MHz) of compound (1)
- Figure S6.** <sup>1</sup>H-<sup>13</sup>C (HMBC) NMR (CDCl<sub>3</sub>, 600 MHz) of compound (1)
- Figure S7.** <sup>1</sup>H NMR (CDCl<sub>3</sub>, 600 MHz) of salviandulin (2)
- Figure S8.** <sup>13</sup>C NMR (CDCl<sub>3</sub>, 150 MHz) of salviandulin (2)
- Figure S9.** <sup>3</sup>C (DEPT) NMR (CDCl<sub>3</sub>, 150 MHz) of salviandulin (2)
- Figure S10.** <sup>1</sup>H-<sup>1</sup>H COSY NMR (CDCl<sub>3</sub>, 600 MHz) of salviandulin (2)
- Figure S11.** <sup>1</sup>H-<sup>13</sup>C (HSQC) NMR (CDCl<sub>3</sub>, 600 MHz) of salviandulin (2)
- Figure S12.** <sup>1</sup>H-<sup>13</sup>C (HMBC) NMR (CDCl<sub>3</sub>, 600 MHz) of salviandulin (2)
- Figure S13.** <sup>1</sup>H NMR (CD<sub>3</sub>COCD<sub>3</sub>, 600 MHz) of eupatorin (3)
- Figure S14.** <sup>13</sup>C NMR (CD<sub>3</sub>COCD<sub>3</sub>, 150 MHz) of eupatorin (3)
- Figure S15.** <sup>3</sup>C (DEPT) NMR (CD<sub>3</sub>COCD<sub>3</sub>, 150 MHz) of eupatorin (3)
- Figure S16.** <sup>1</sup>H-<sup>1</sup>H COSY NMR (CD<sub>3</sub>COCD<sub>3</sub>, 600 MHz) of eupatorin (3)
- Figure S17.** <sup>1</sup>H-<sup>13</sup>C (HSQC) NMR (CD<sub>3</sub>COCD<sub>3</sub>, 600 MHz) of eupatorin (3)
- Figure S18.** <sup>1</sup>H-<sup>13</sup>C (HMBC) NMR (CD<sub>3</sub>COCD<sub>3</sub>, 600 MHz) of eupatorin (3)

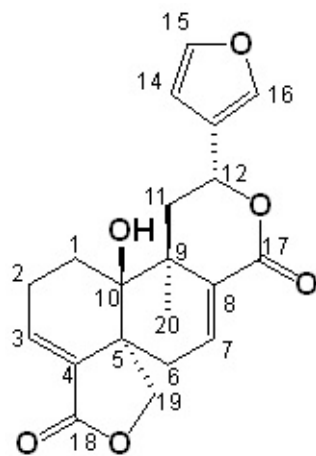

Compound (1)

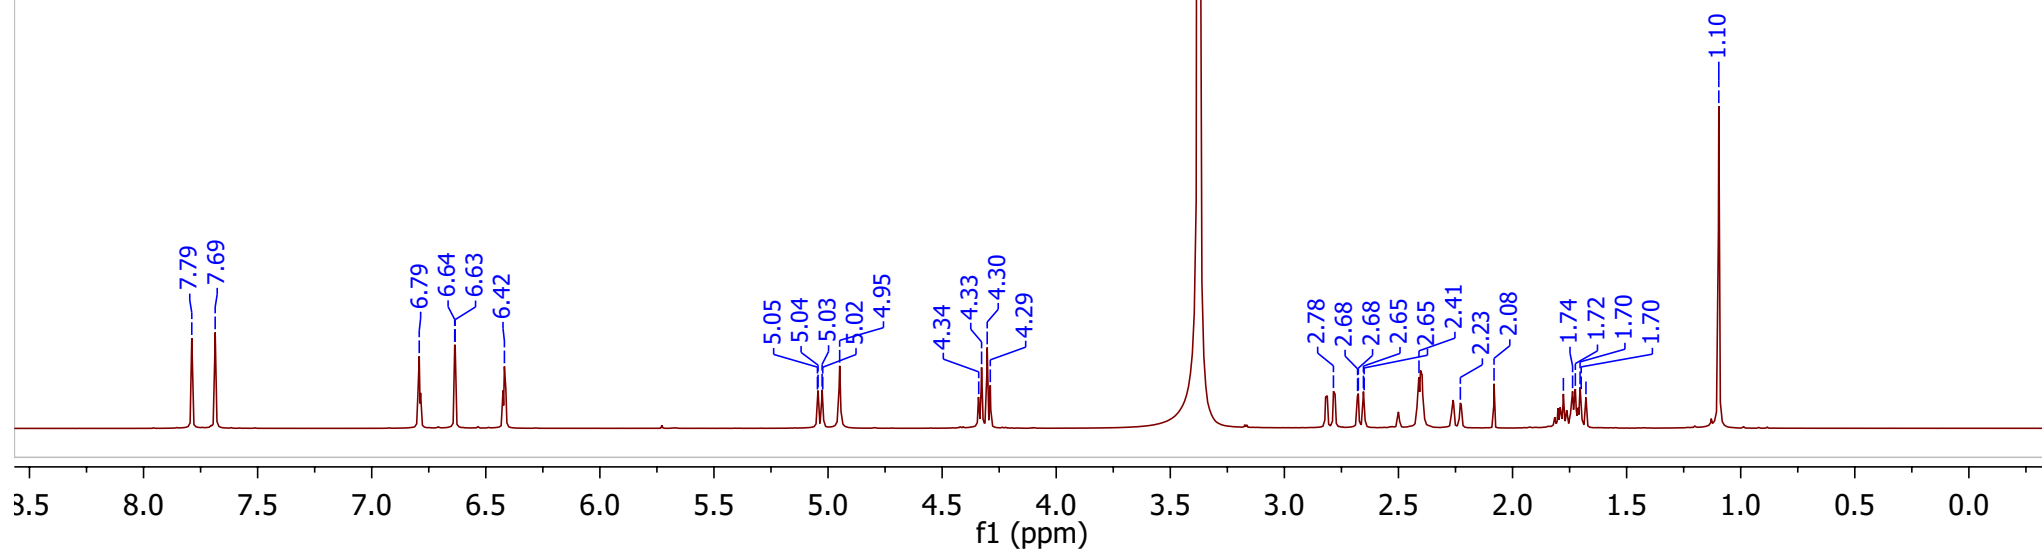

Figure S1. <sup>1</sup>H NMR (CDCl<sub>3</sub>, 600 MHz) of compound (1)

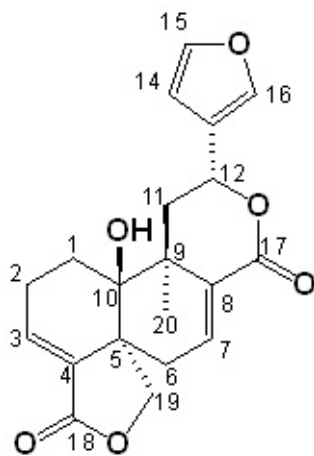

Compound (1)

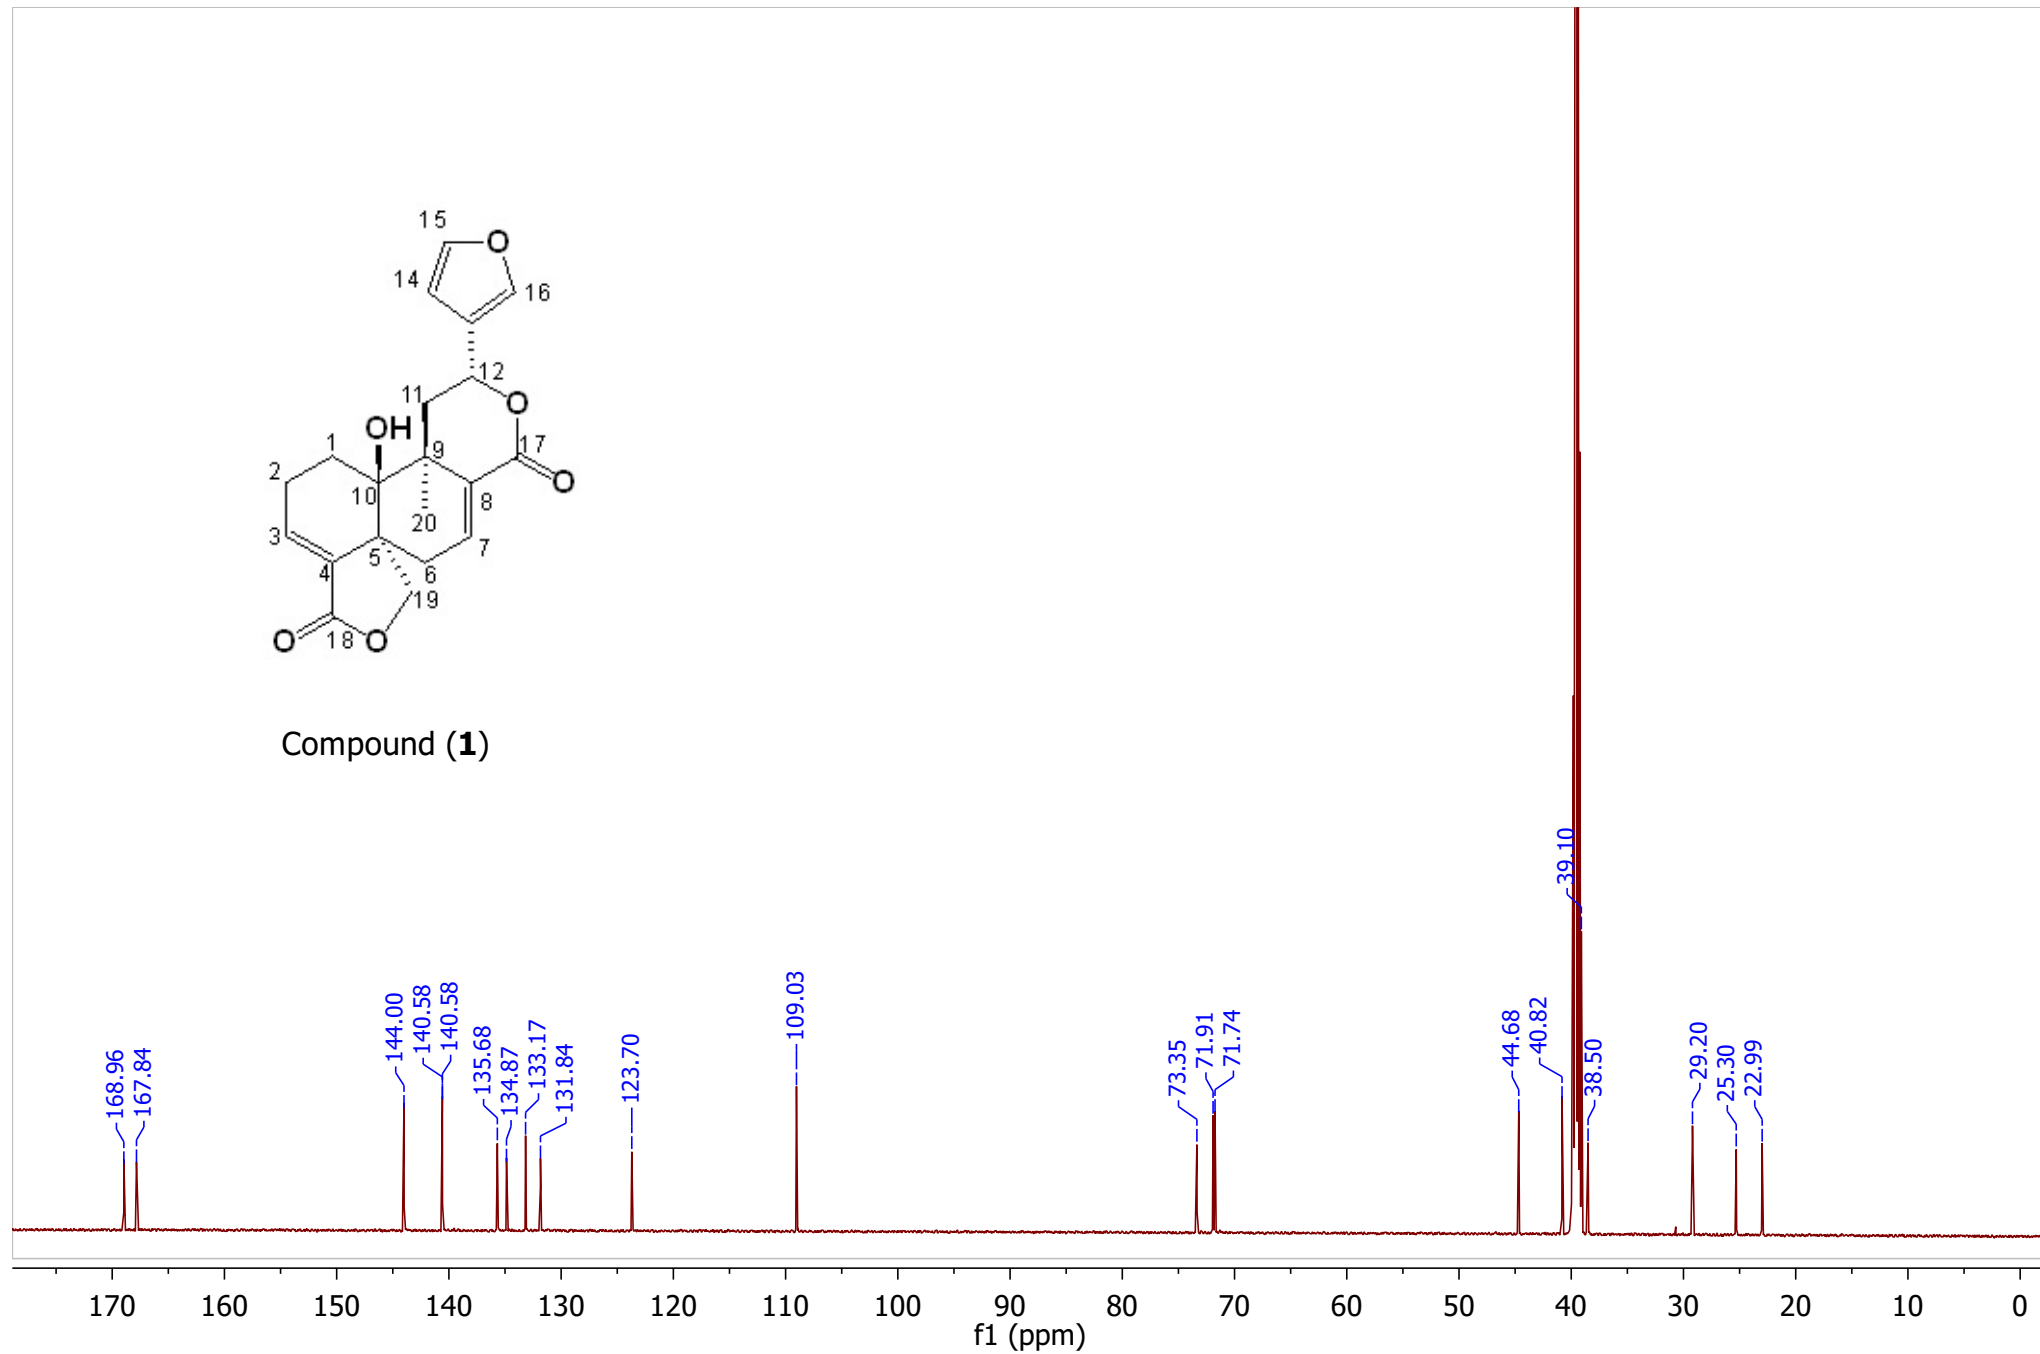

Figure S2.  $^{13}\text{C}$  NMR (CDCl<sub>3</sub>, 150 MHz) of compound (1)



Compound (**1**)

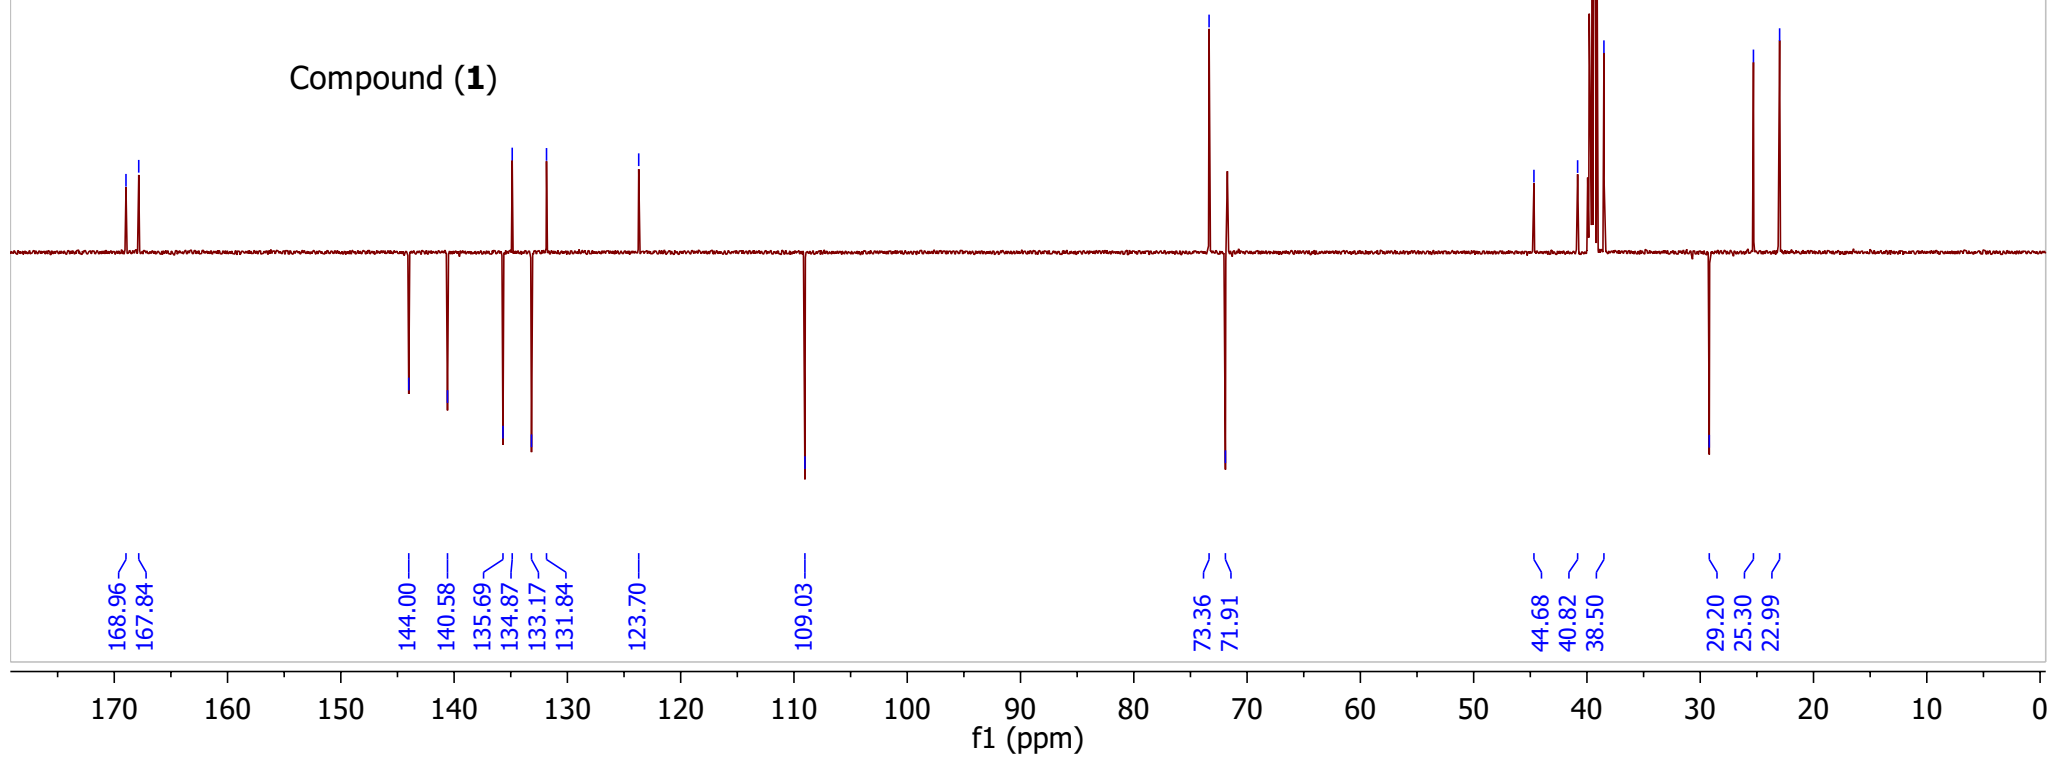

Figure S3.  $^{13}\text{C}$  (DEPT) NMR ( $\text{CDCl}_3$ , 150 MHz) of compound (**1**)

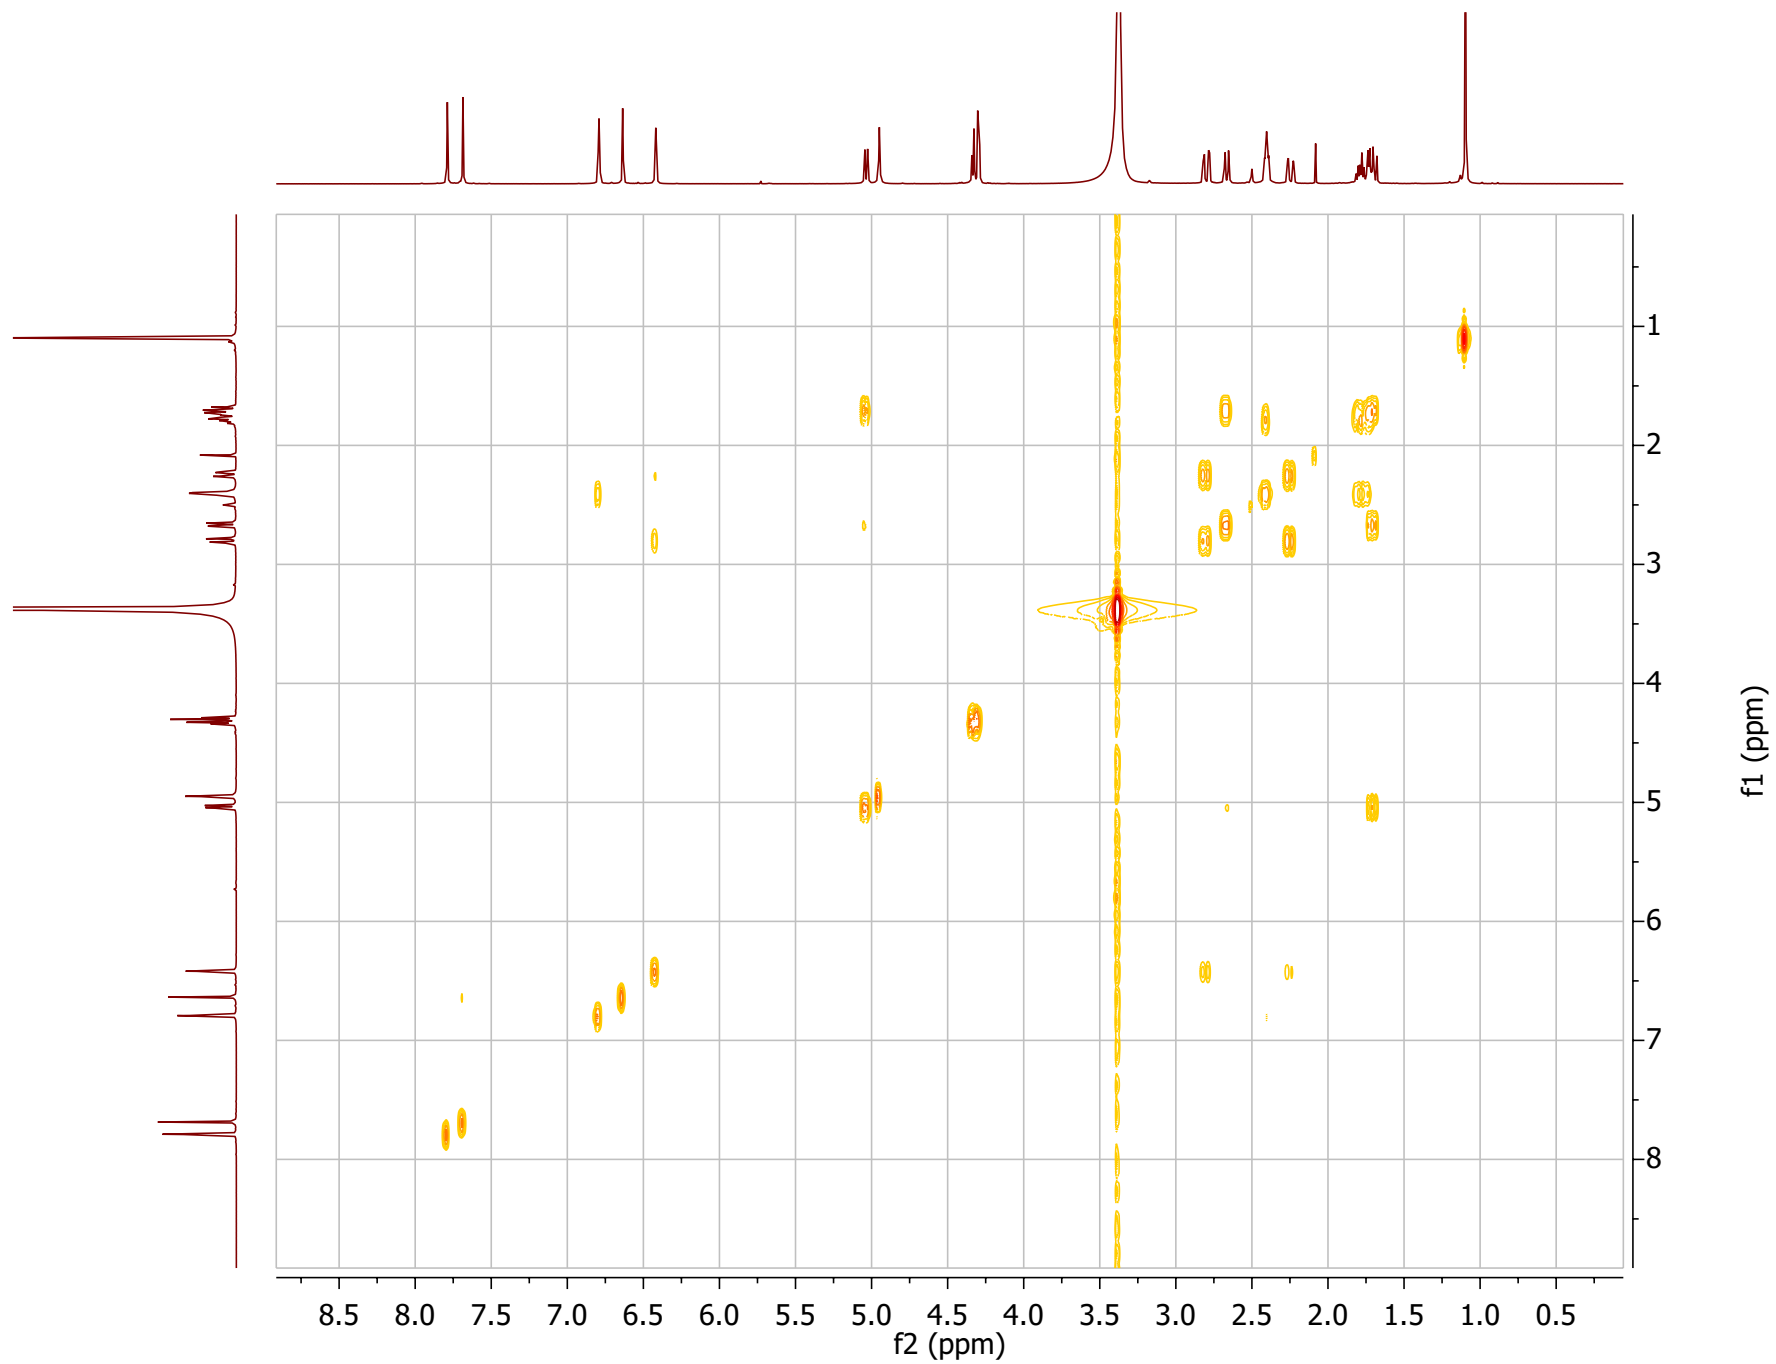

Figure S4.  $^1\text{H}$ - $^1\text{H}$  COSY NMR ( $\text{CDCl}_3$ , 600 MHz) of compound **(1)**

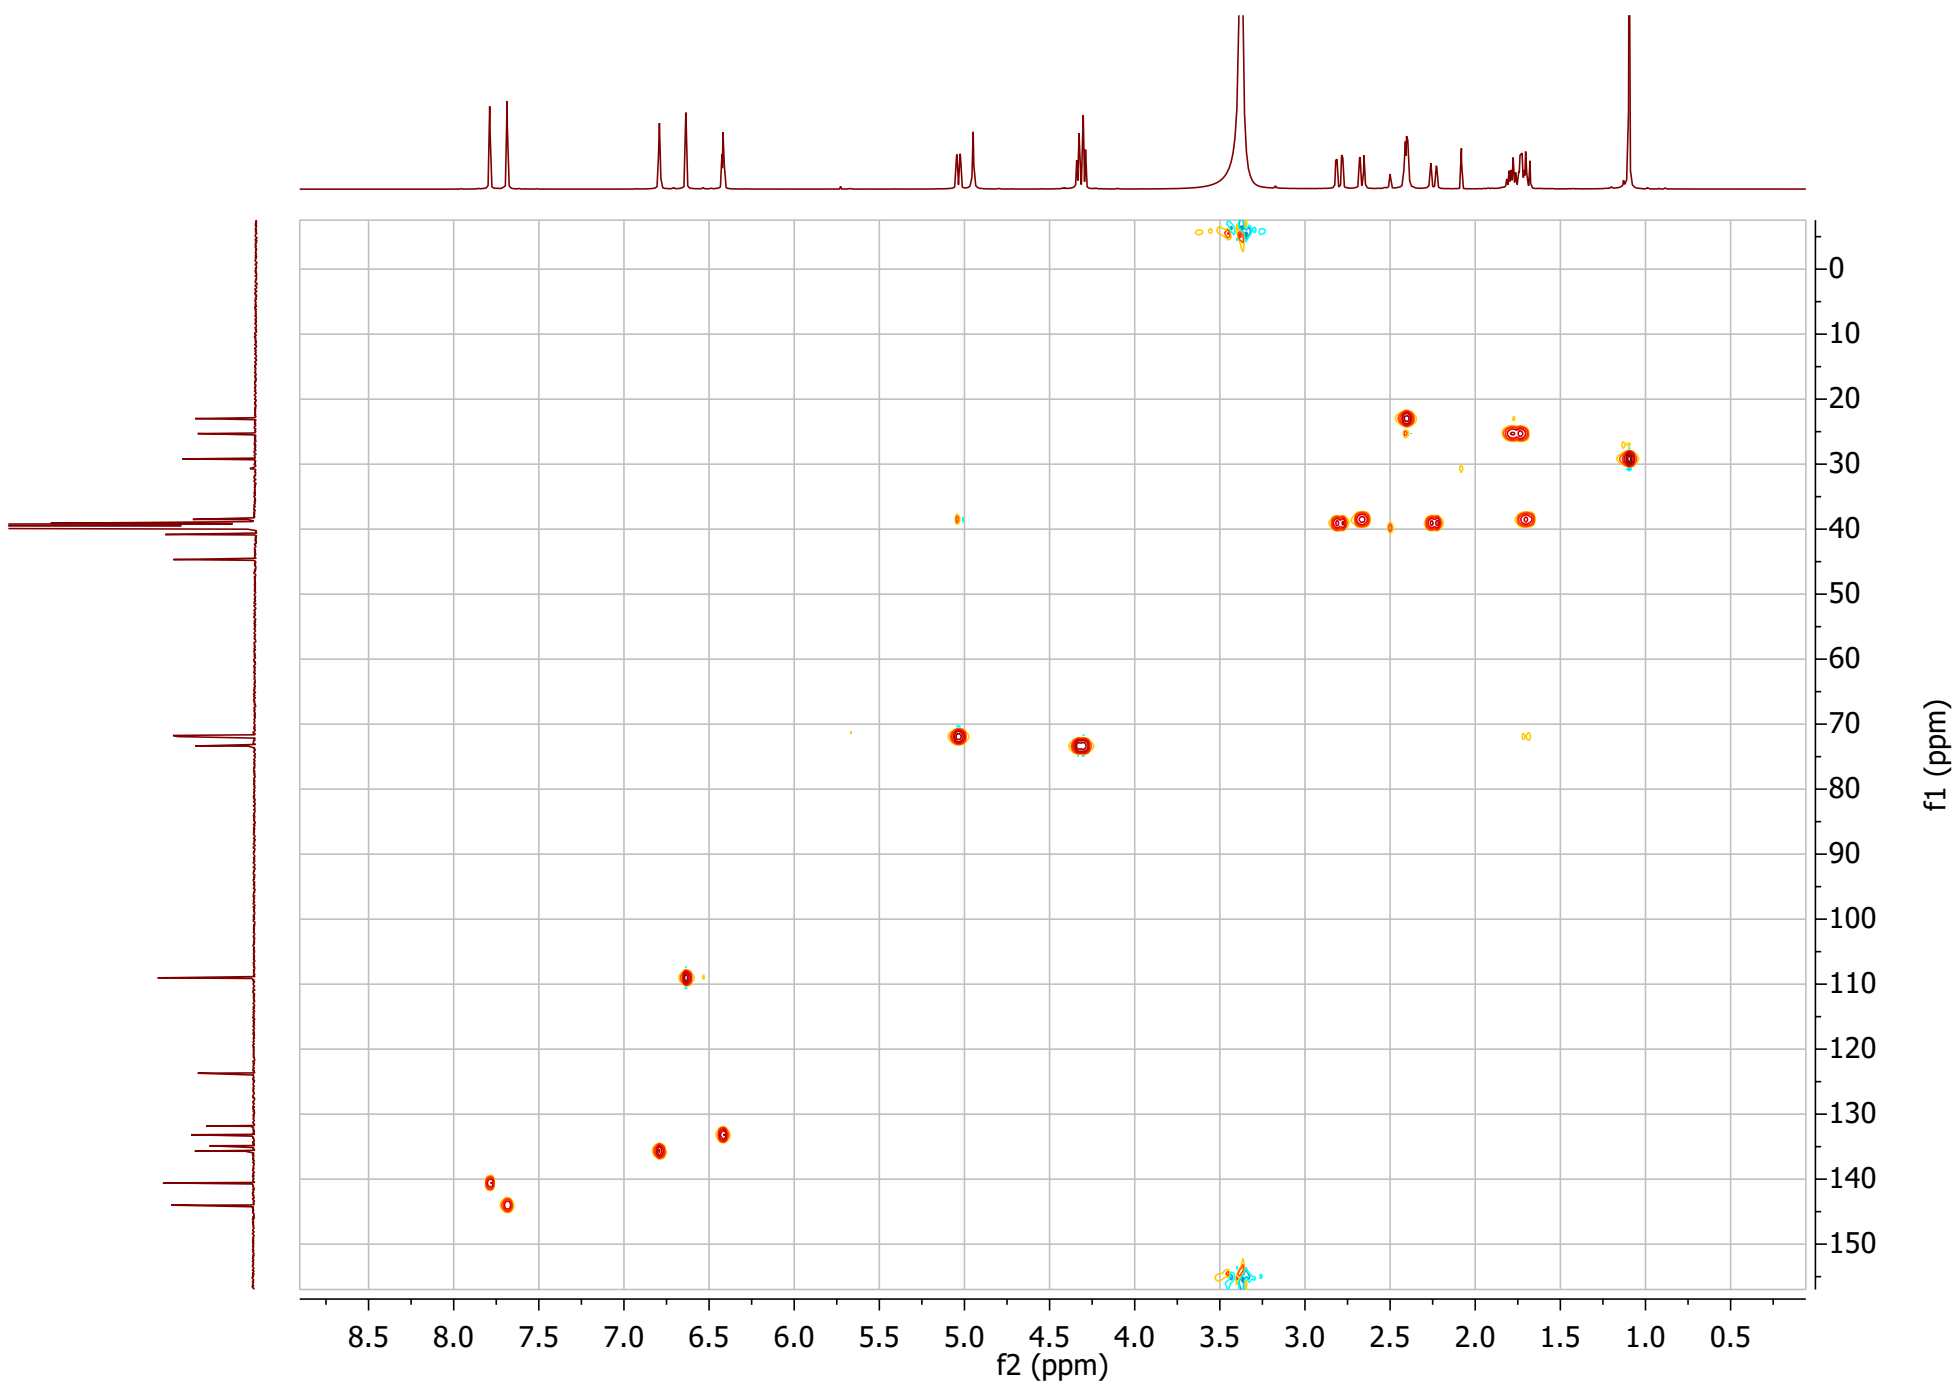

Figure S5.  $^1\text{H}$ - $^{13}\text{C}$  (HSQC) NMR ( $\text{CDCl}_3$ , 600 MHz) of compound (**1**)

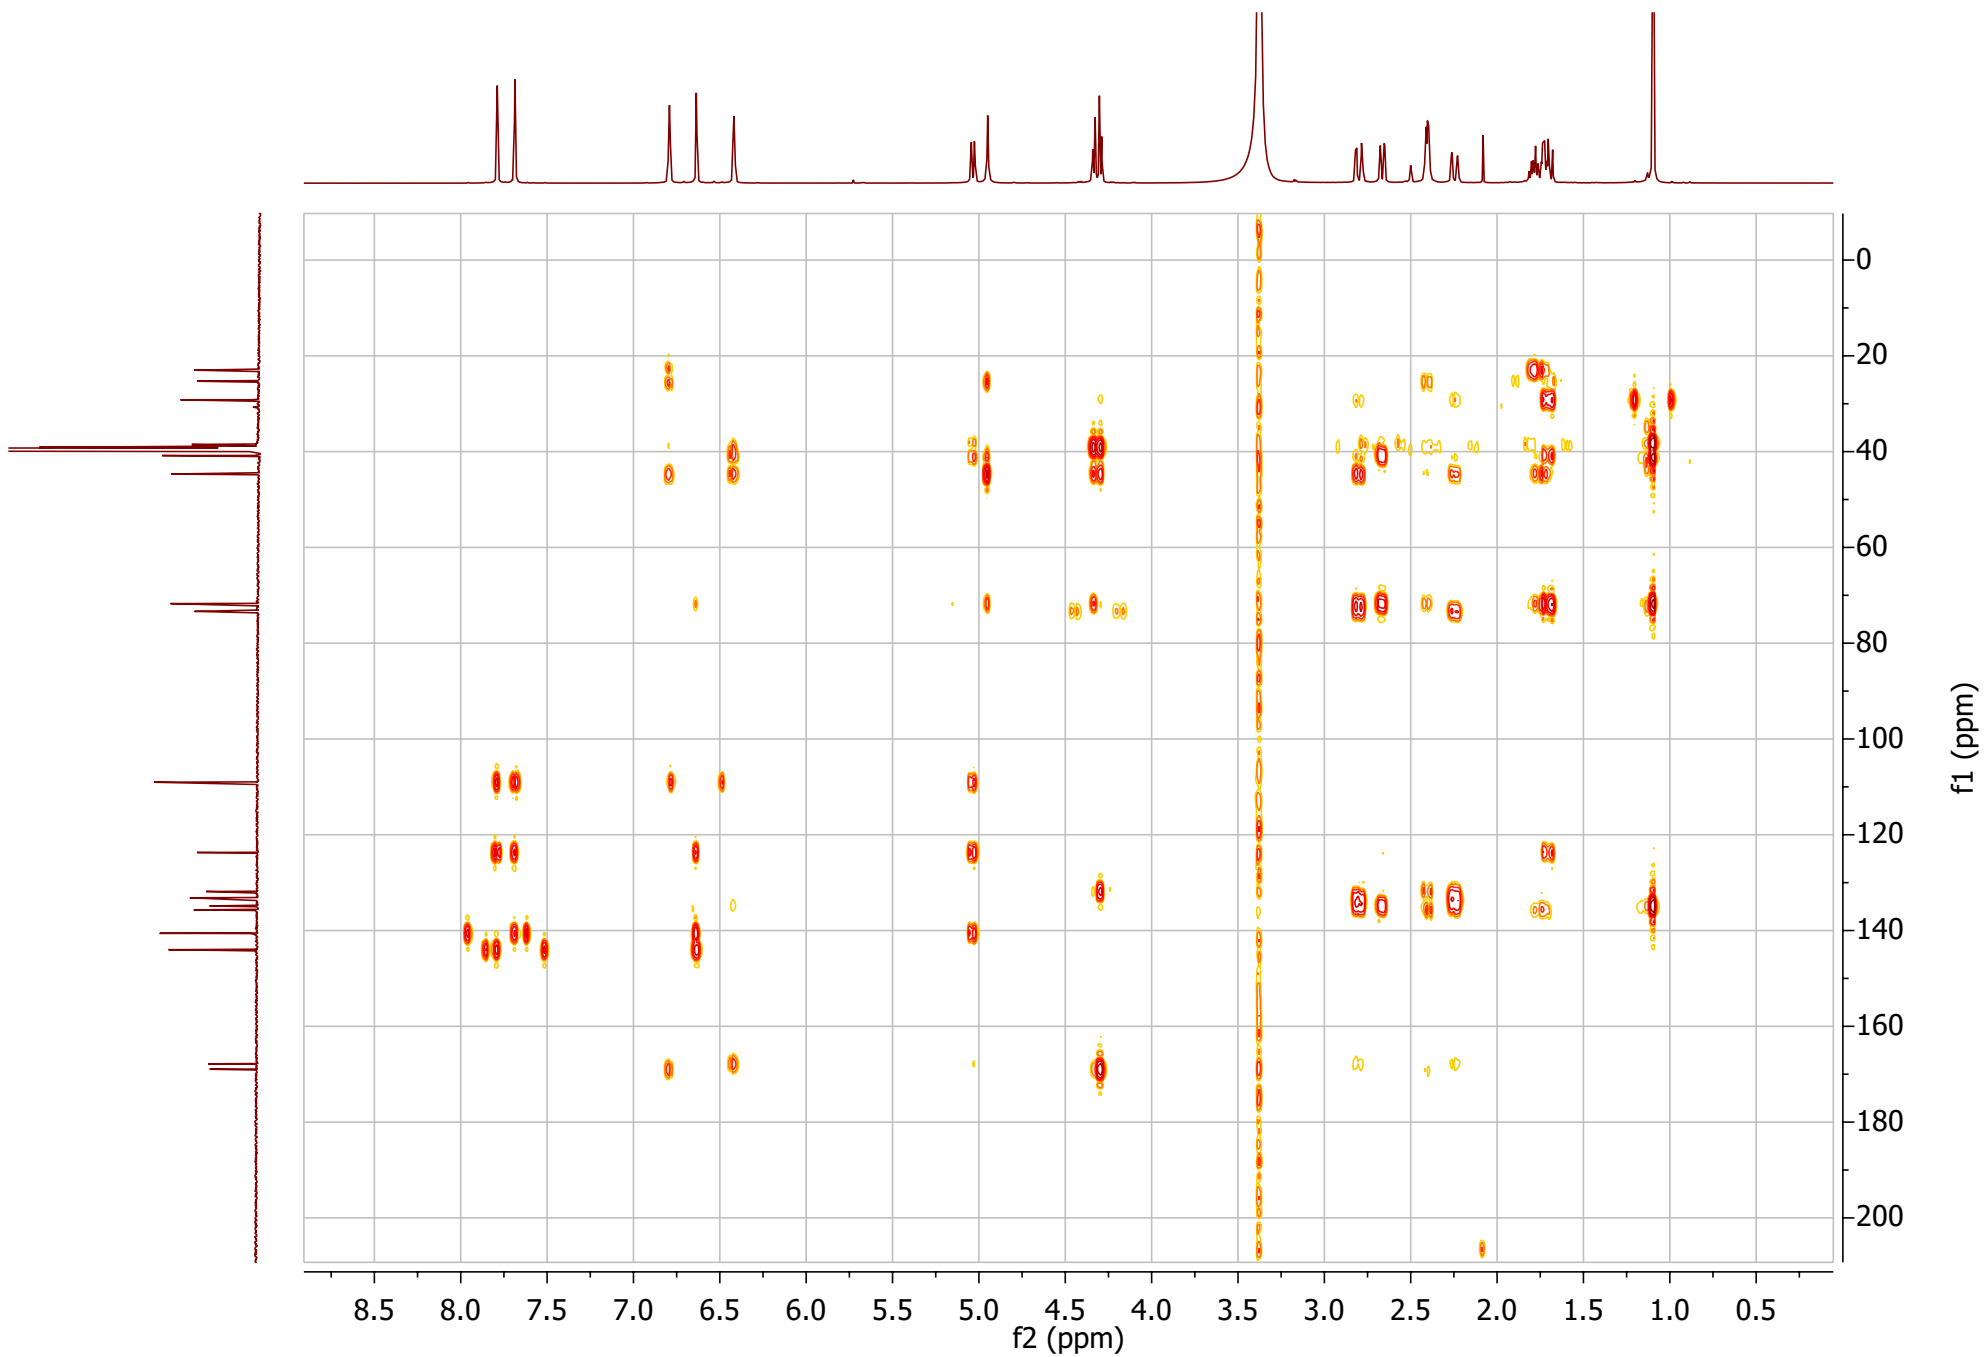

Figure S6.  $^1\text{H}$ - $^{13}\text{C}$  (HMBC) NMR ( $\text{CDCl}_3$ , 600 Mhz) of compound (**1**)

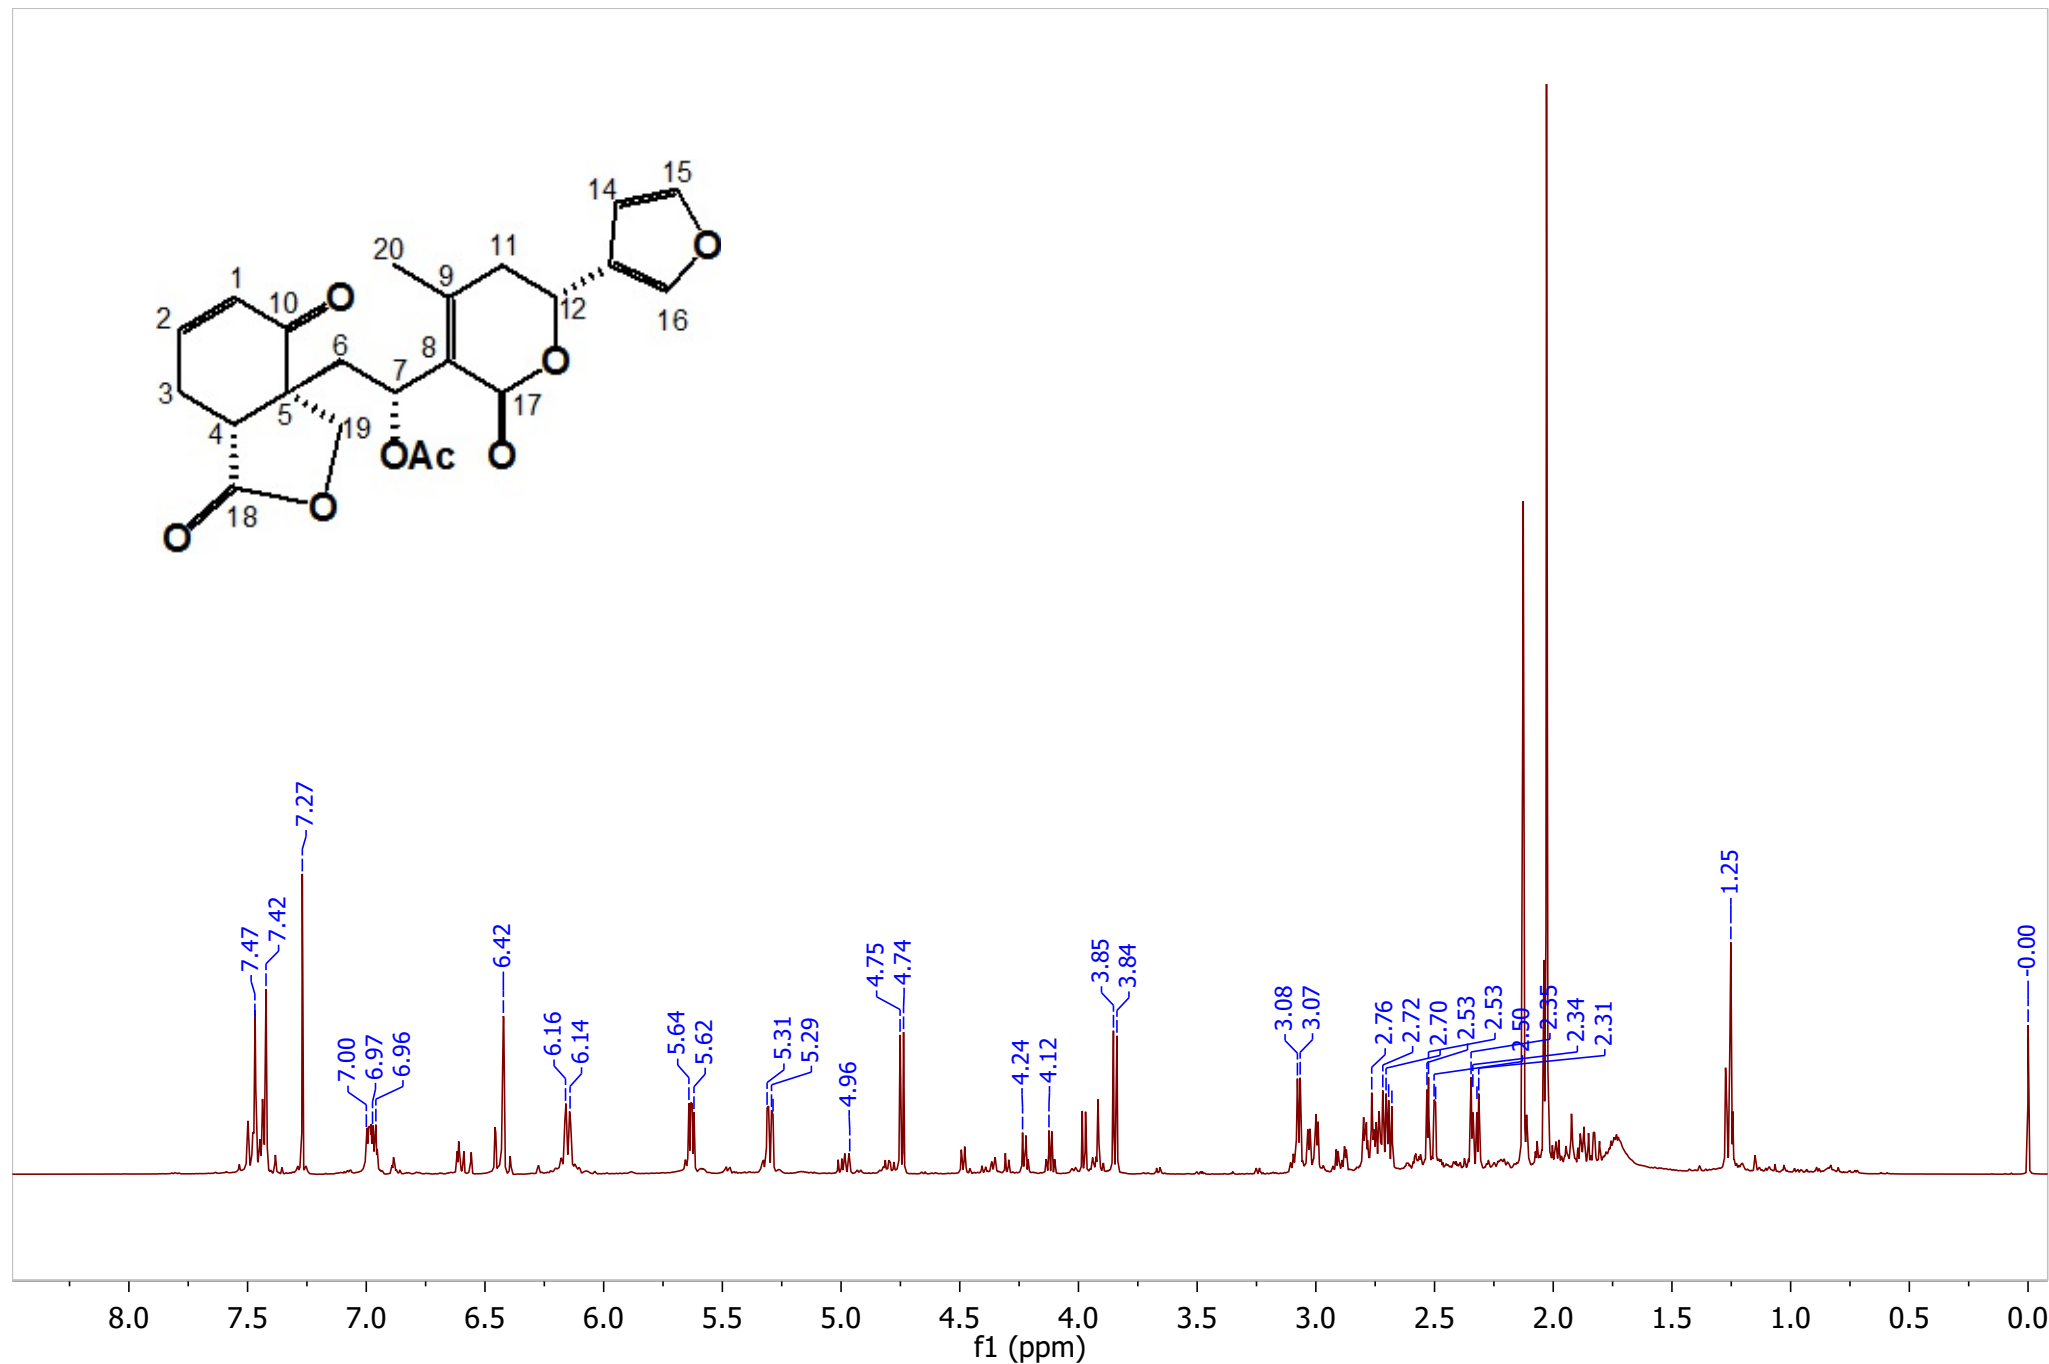

Figure S7. <sup>1</sup>H NMR (CDCl<sub>3</sub>, 600 MHz) of salviandulin A (**2**)



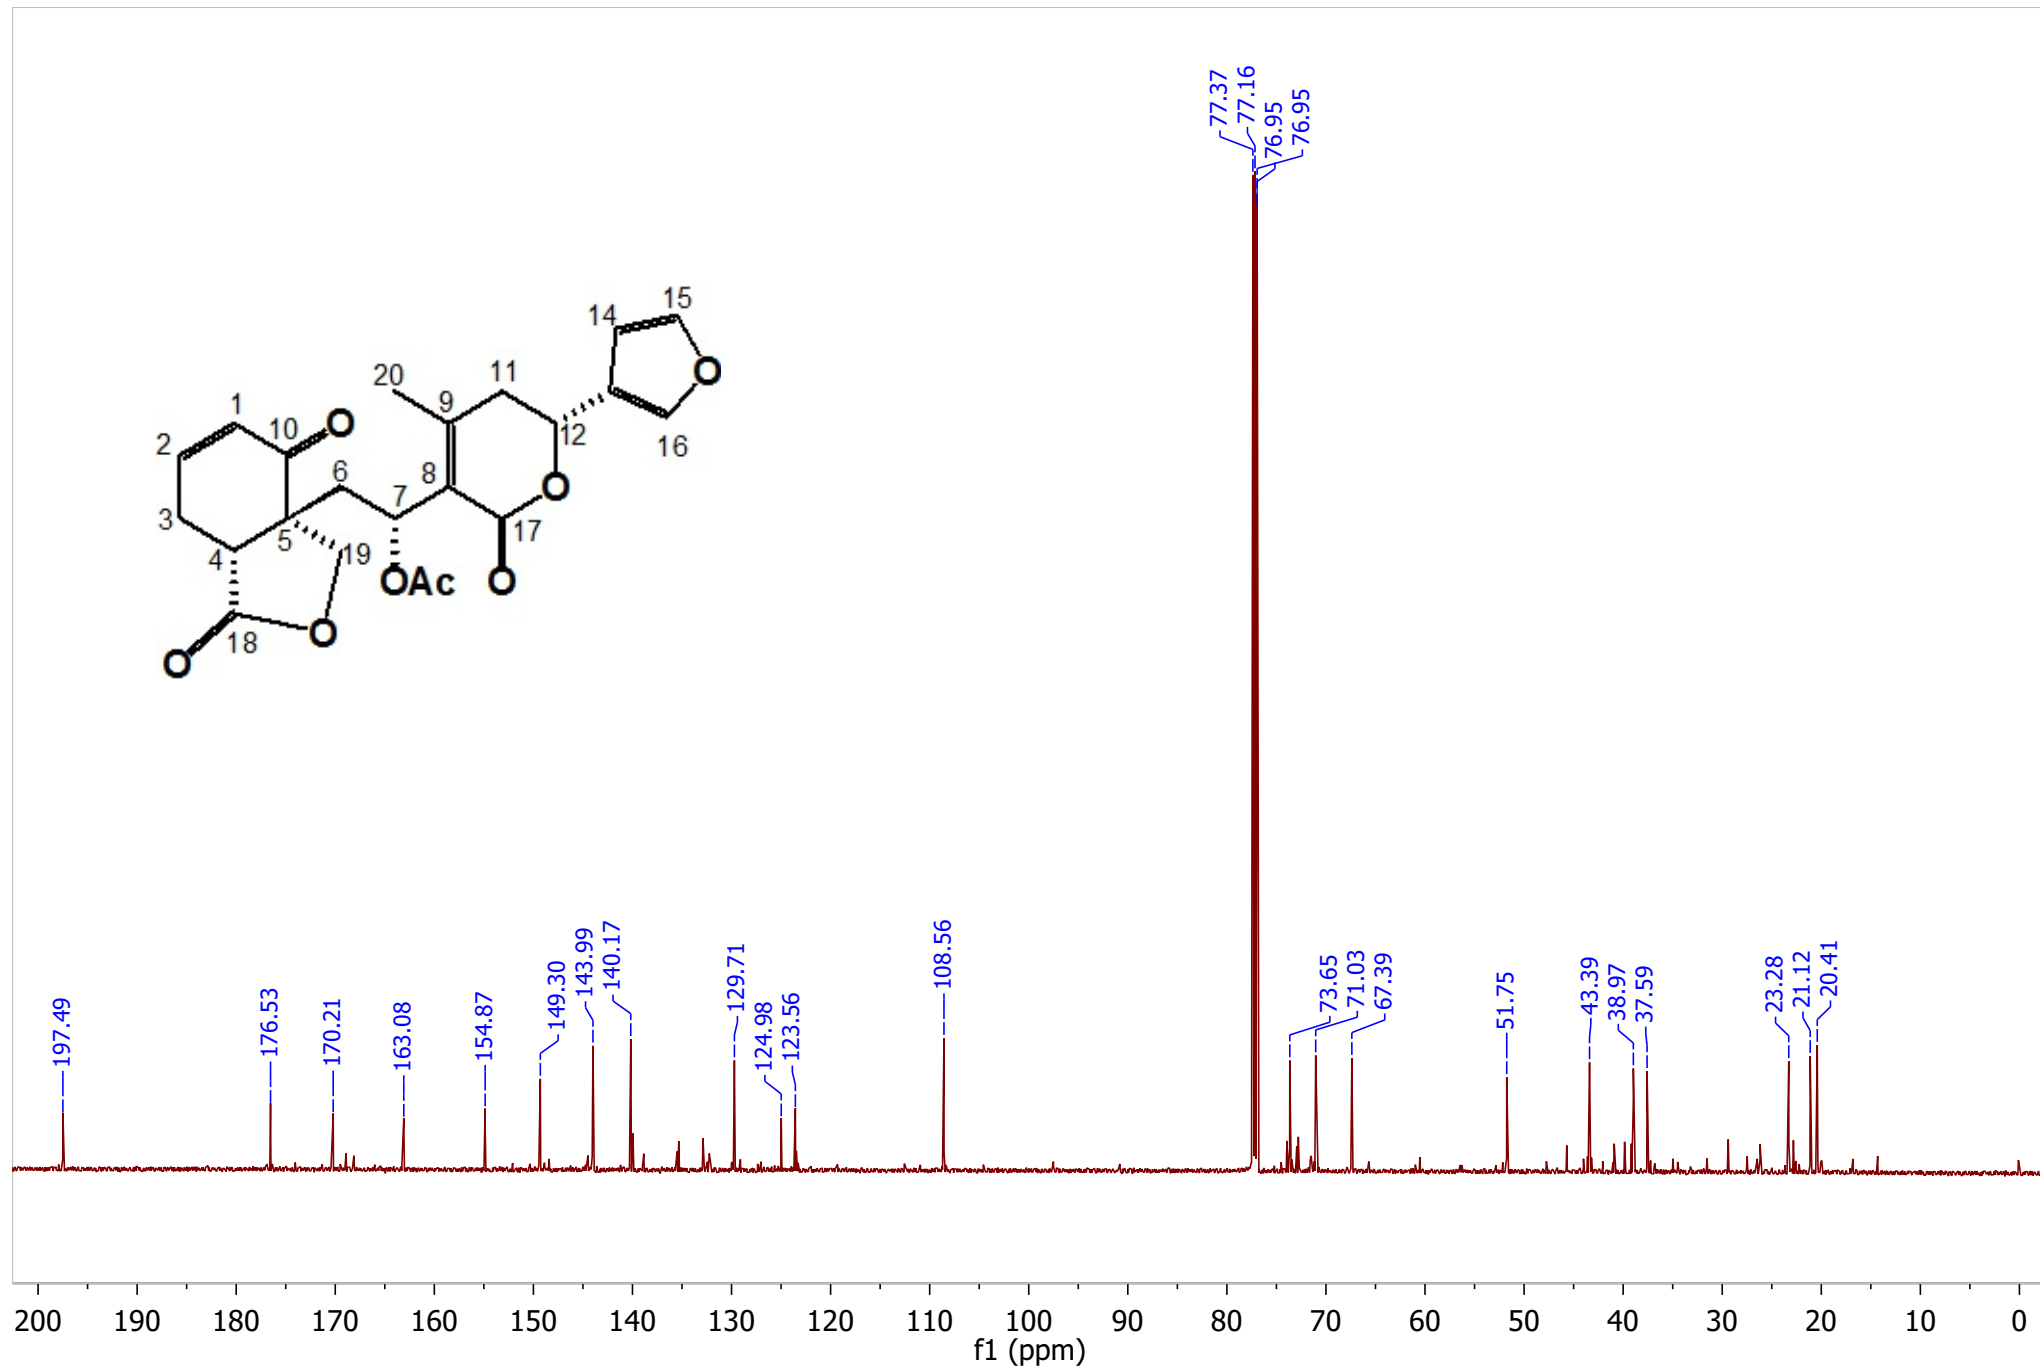

Figure S8.  $^{13}\text{C}$  NMR (CDCl<sub>3</sub>, 150 MHz) of salviandulin A (2)

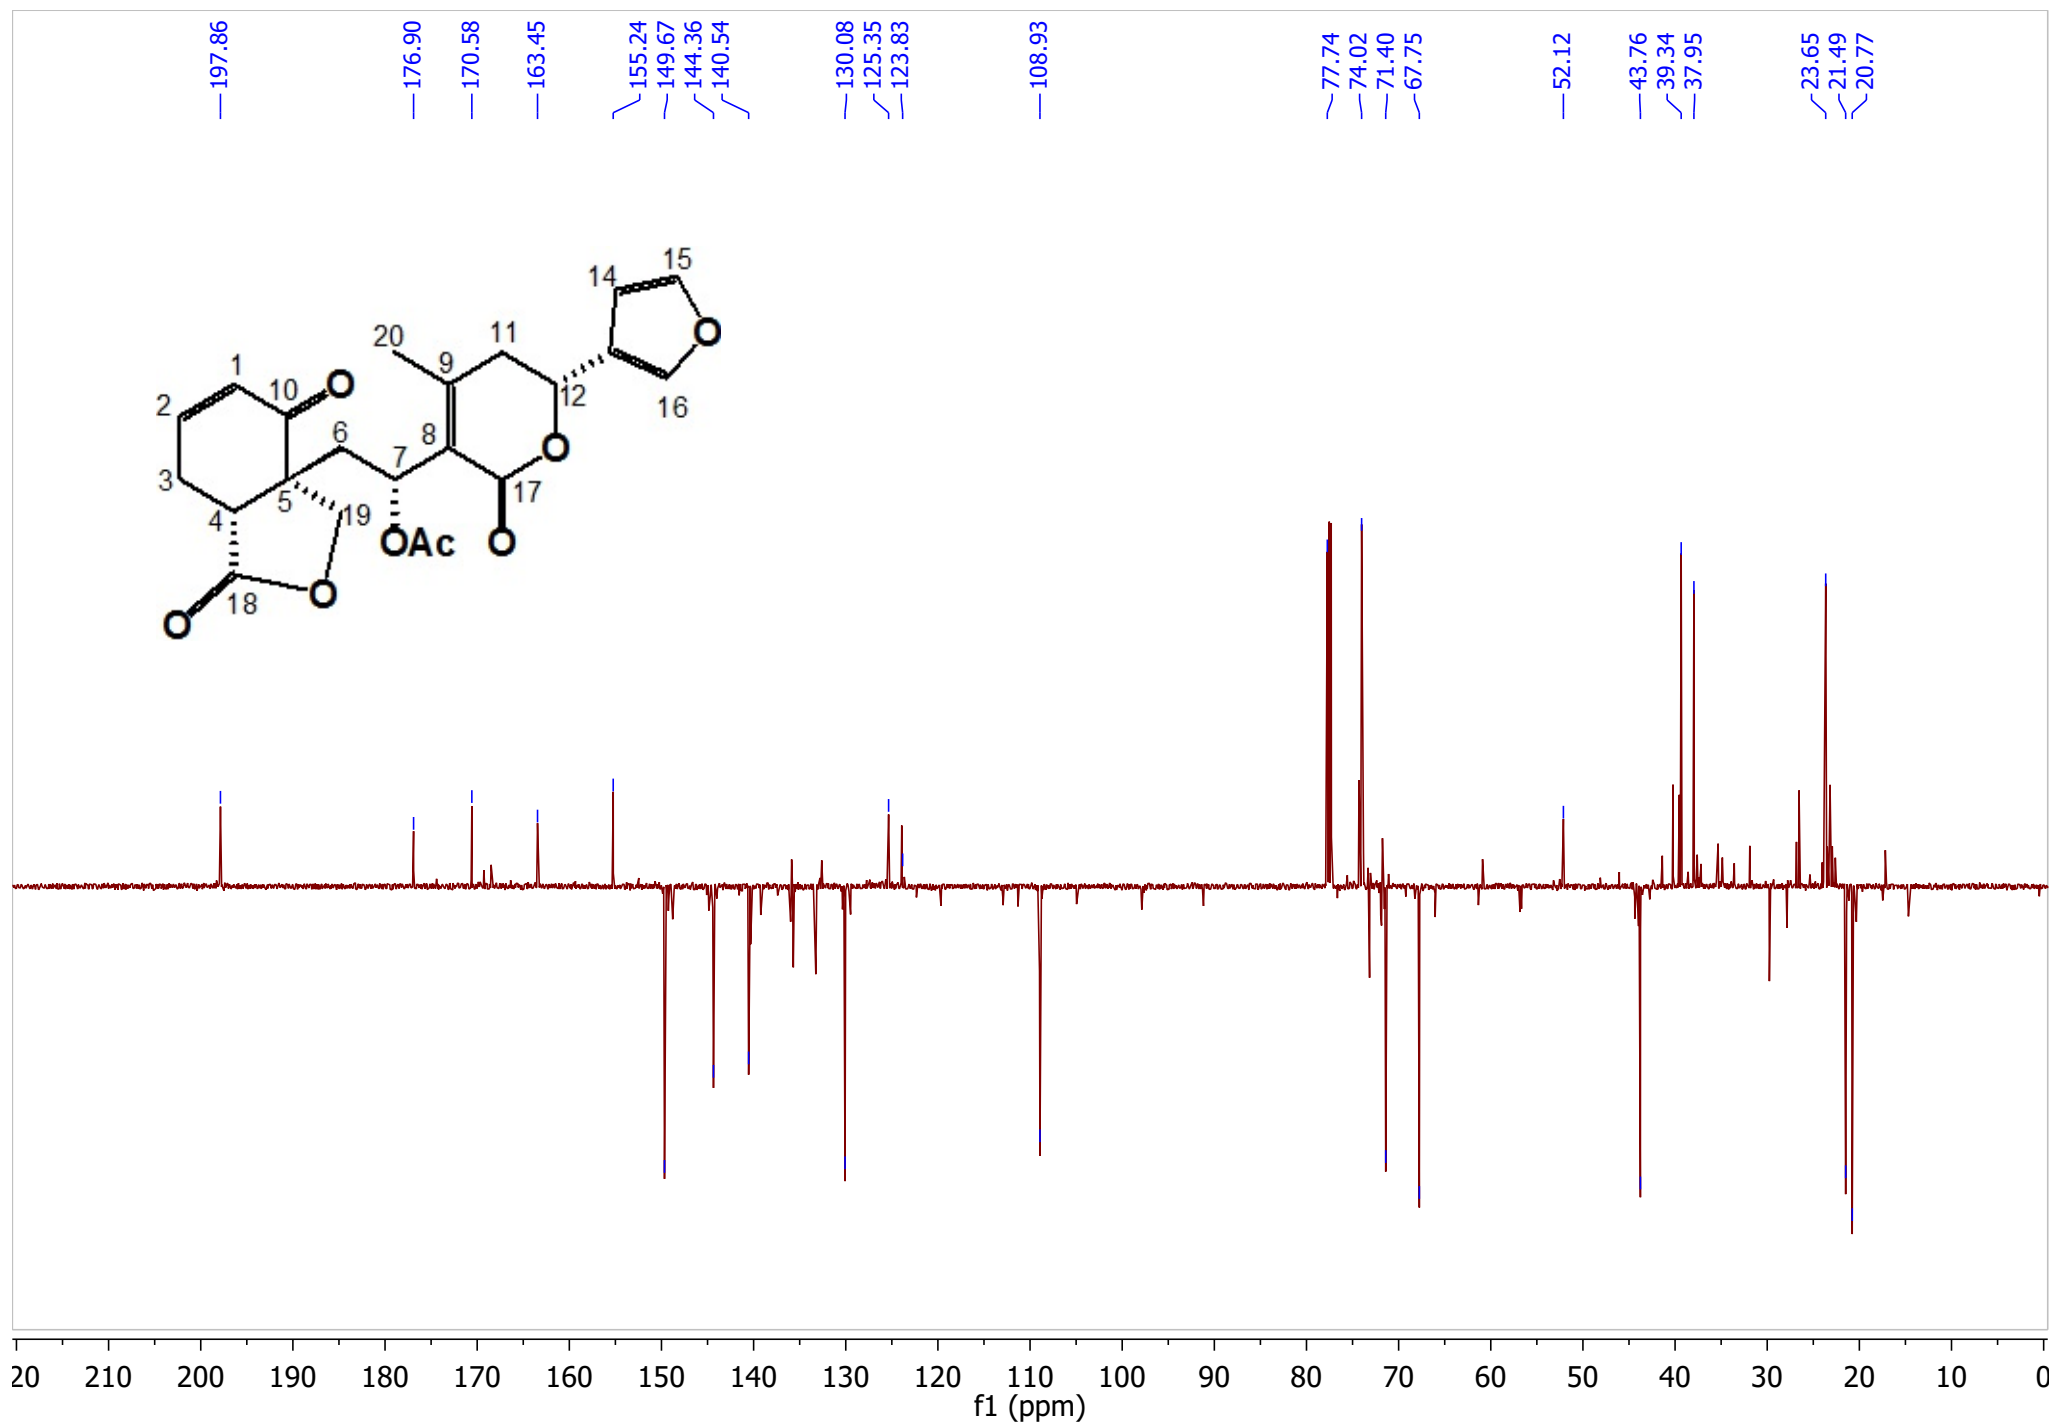

Figure S9.  $^{13}\text{C}$  (DEPT) NMR ( $\text{CDCl}_3$ , 150 MHz) of salviandulin A (**2**)

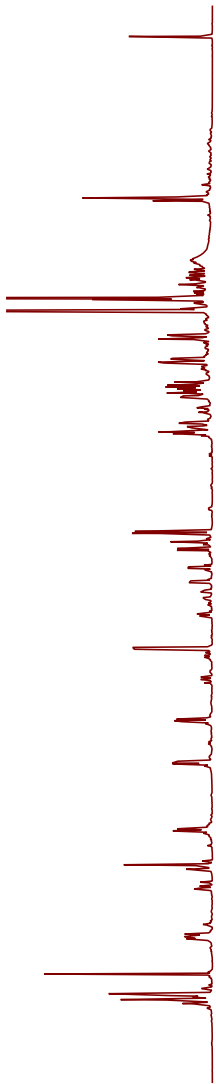

Figure S10.  $^1\text{H}$ - $^1\text{H}$  COSY NMR ( $\text{CDCl}_3$ , 600 MHz) of salviandulin A (**2**)

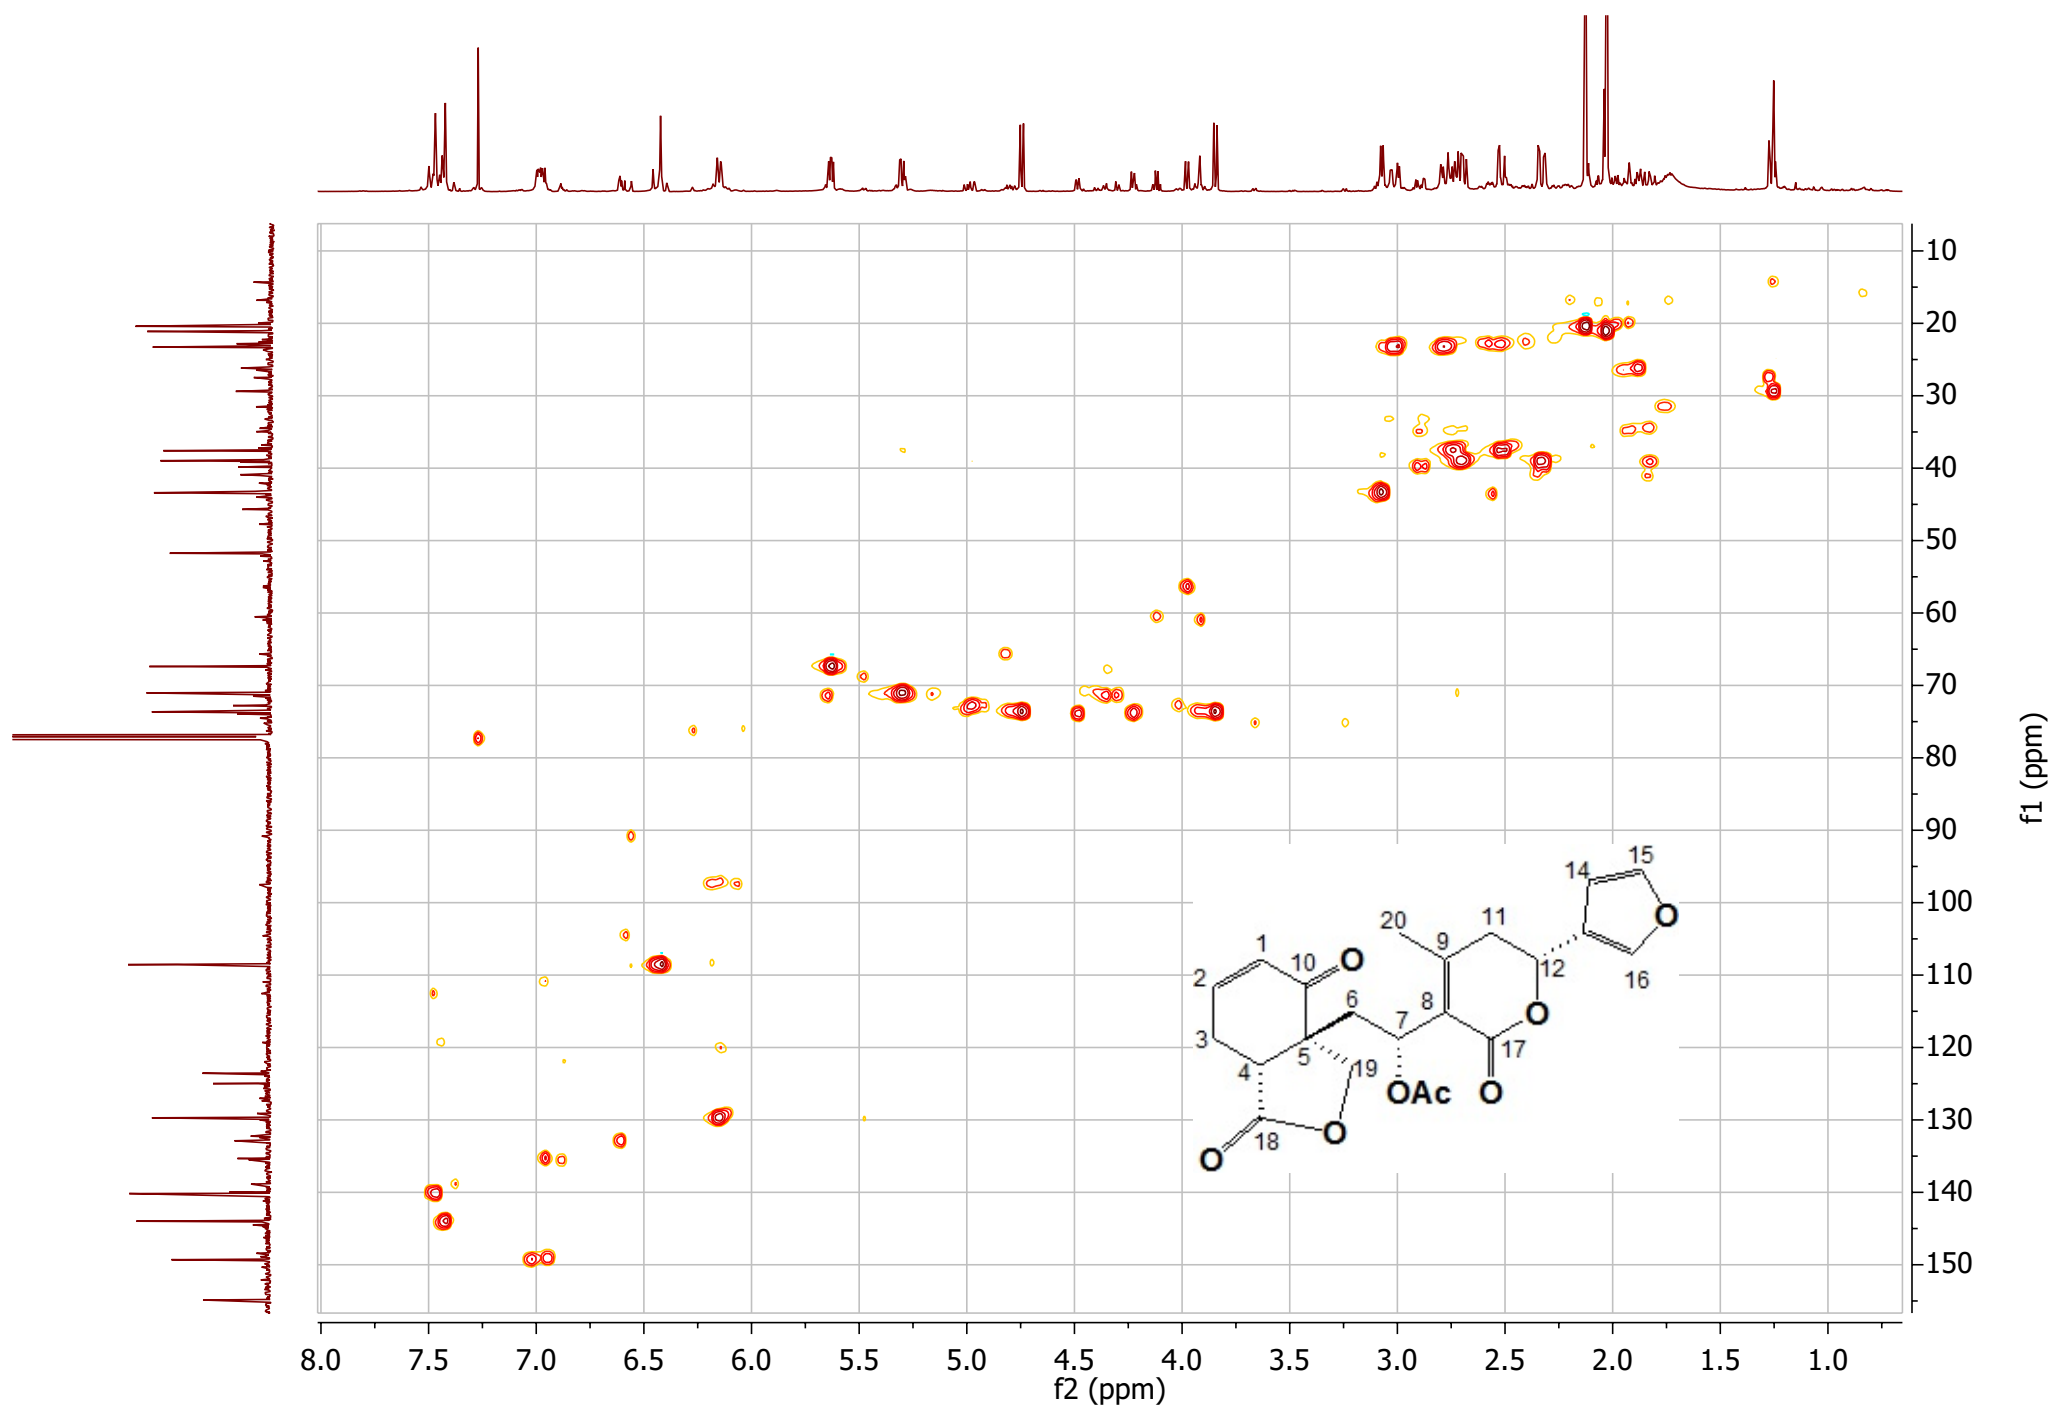

Figure S11.  $^1\text{H}$ - $^{13}\text{C}$  (HSQC) NMR ( $\text{CDCl}_3$ ) of salviandulin A (2)

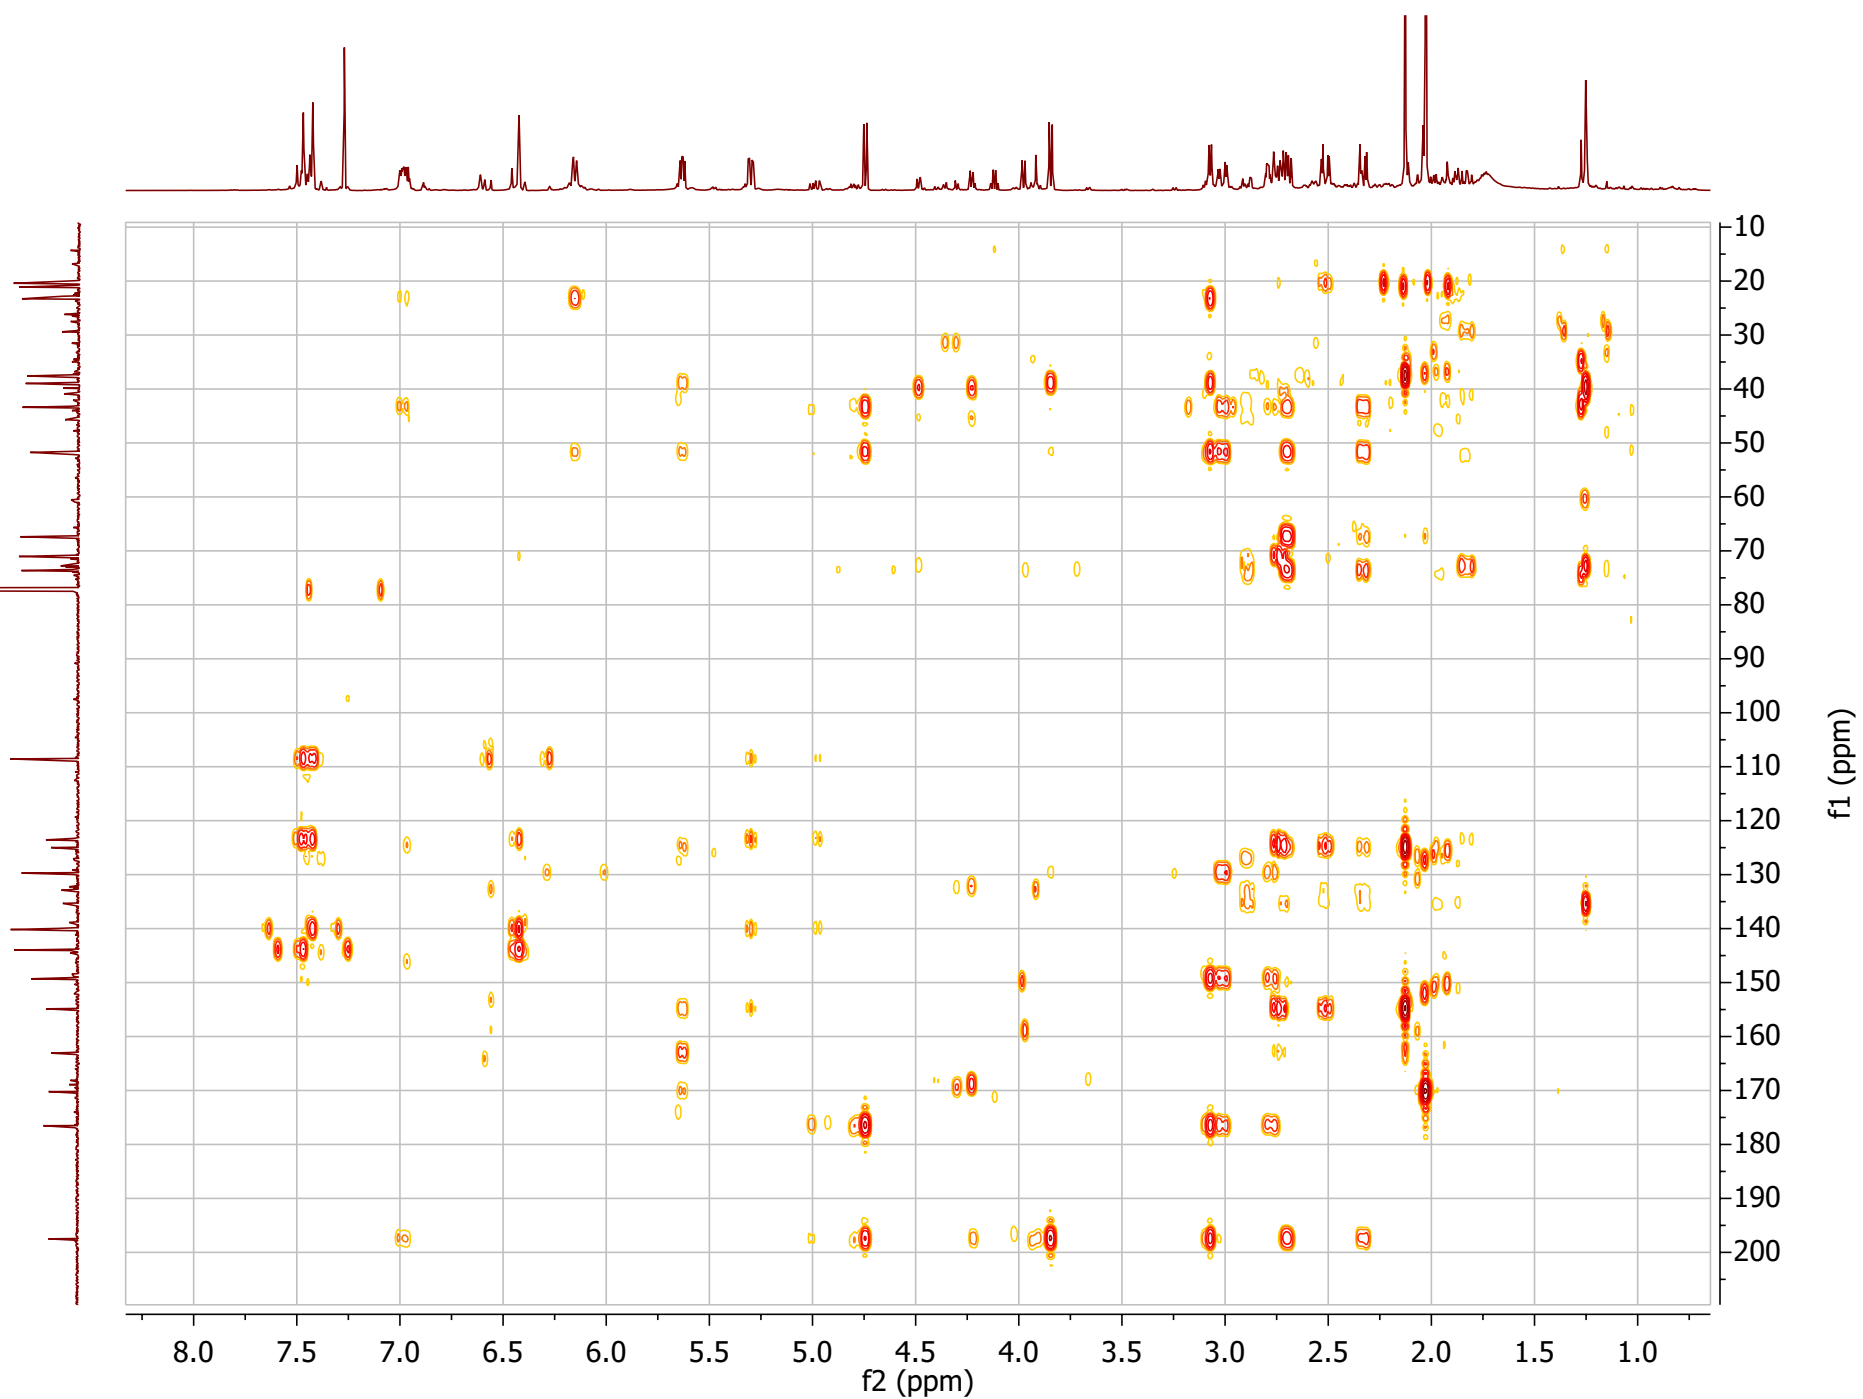

Figure S12.  $^1\text{H}$ - $^{13}\text{C}$  (HMBC) NMR ( $\text{CDCl}_3$ ) of salviandulin A (**2**)

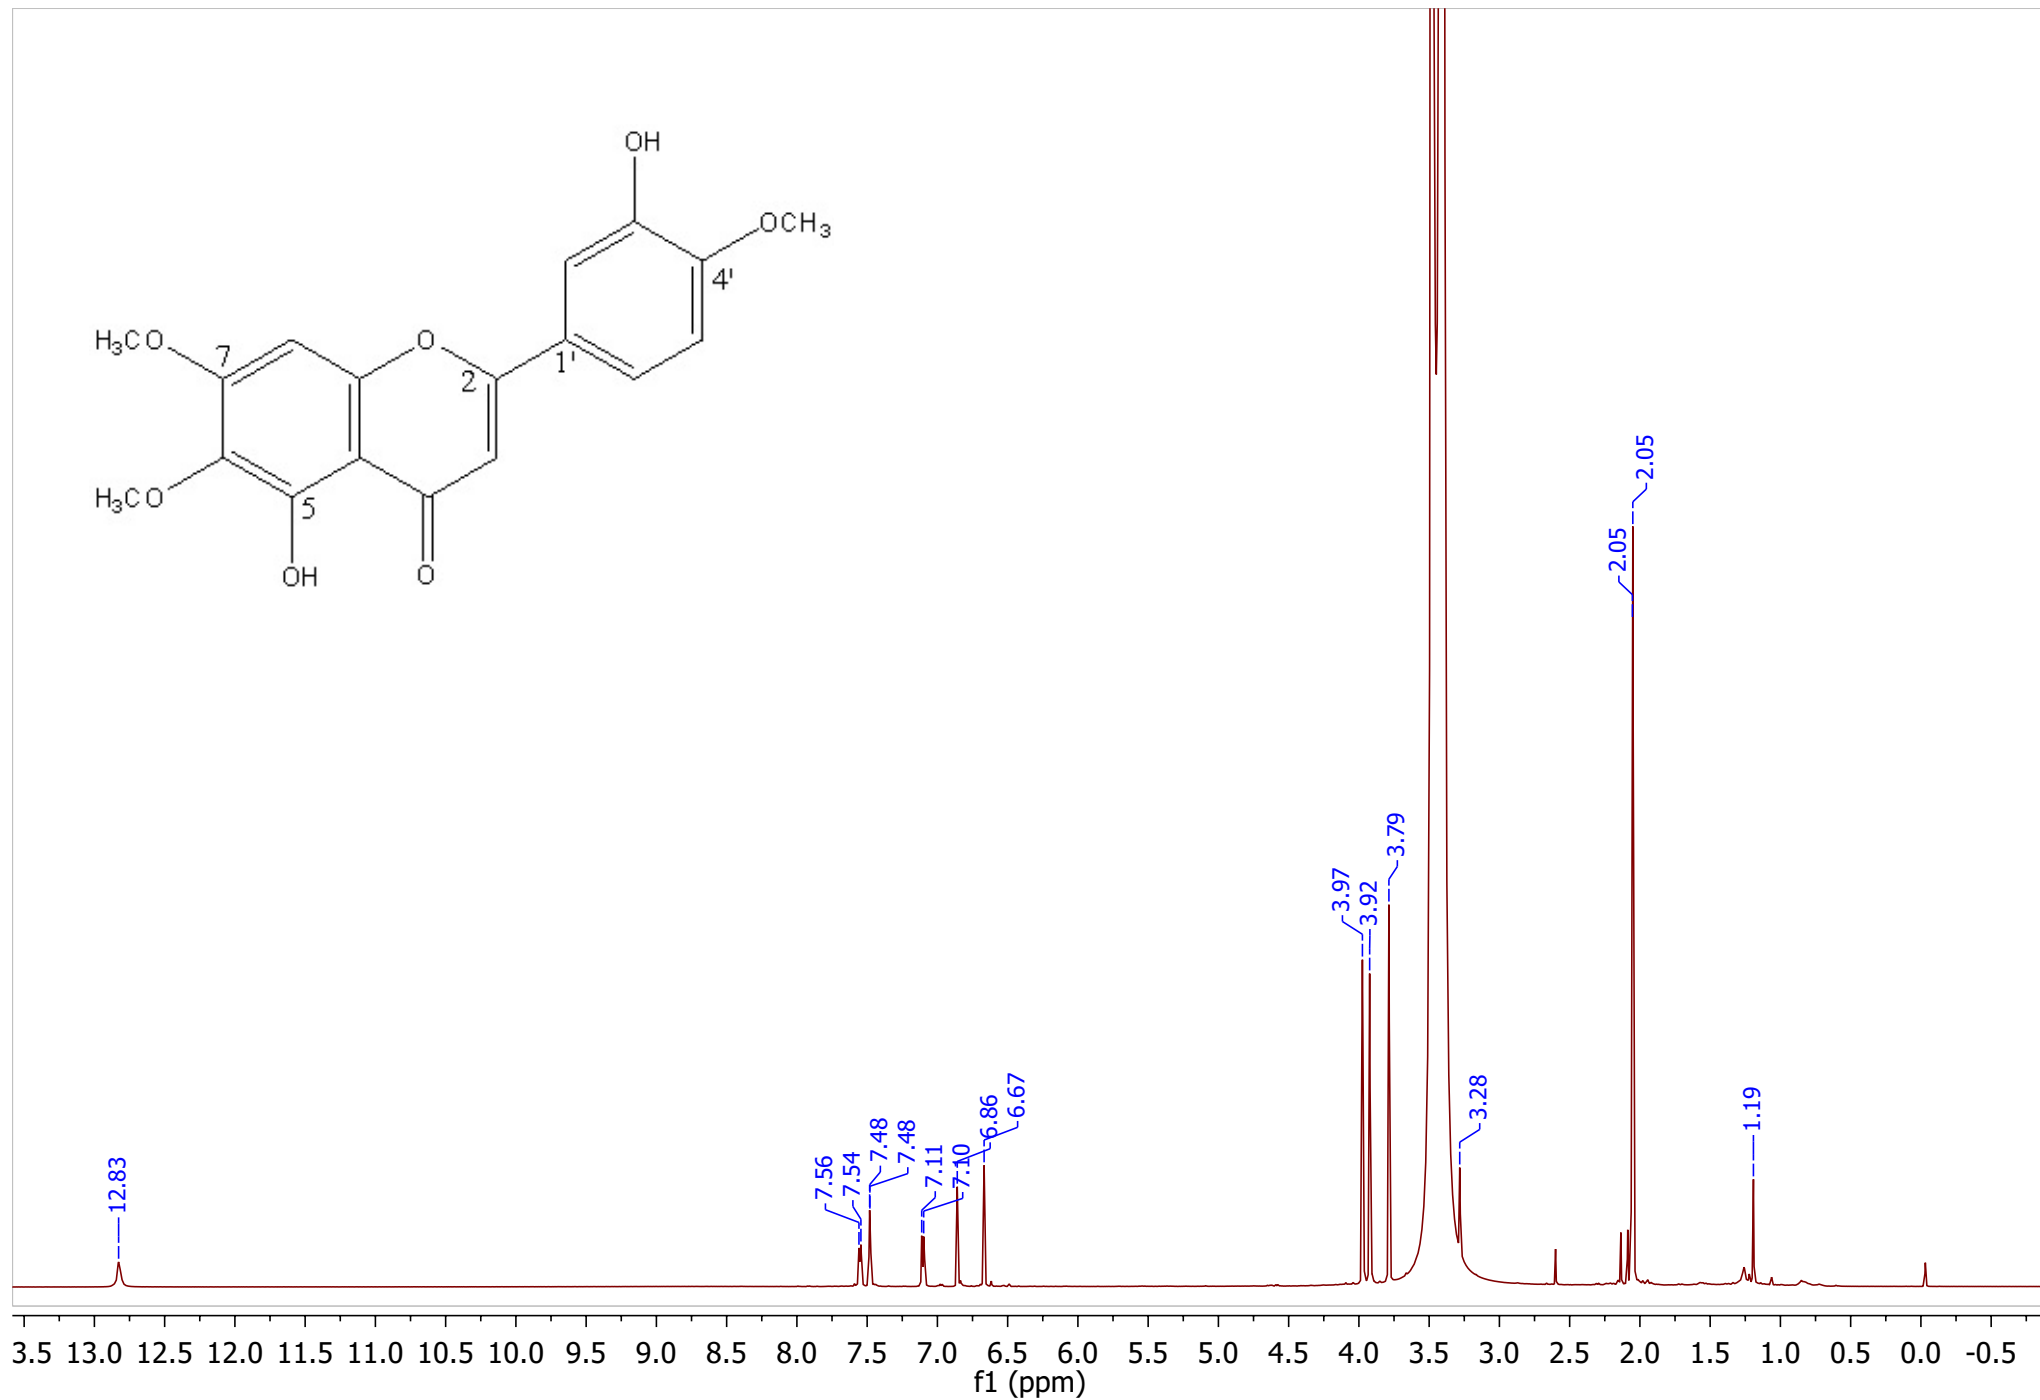

Figure S13. <sup>1</sup>H NMR (CD<sub>3</sub>COCD<sub>3</sub>, 600 MHz) of eupatorin (**3**)

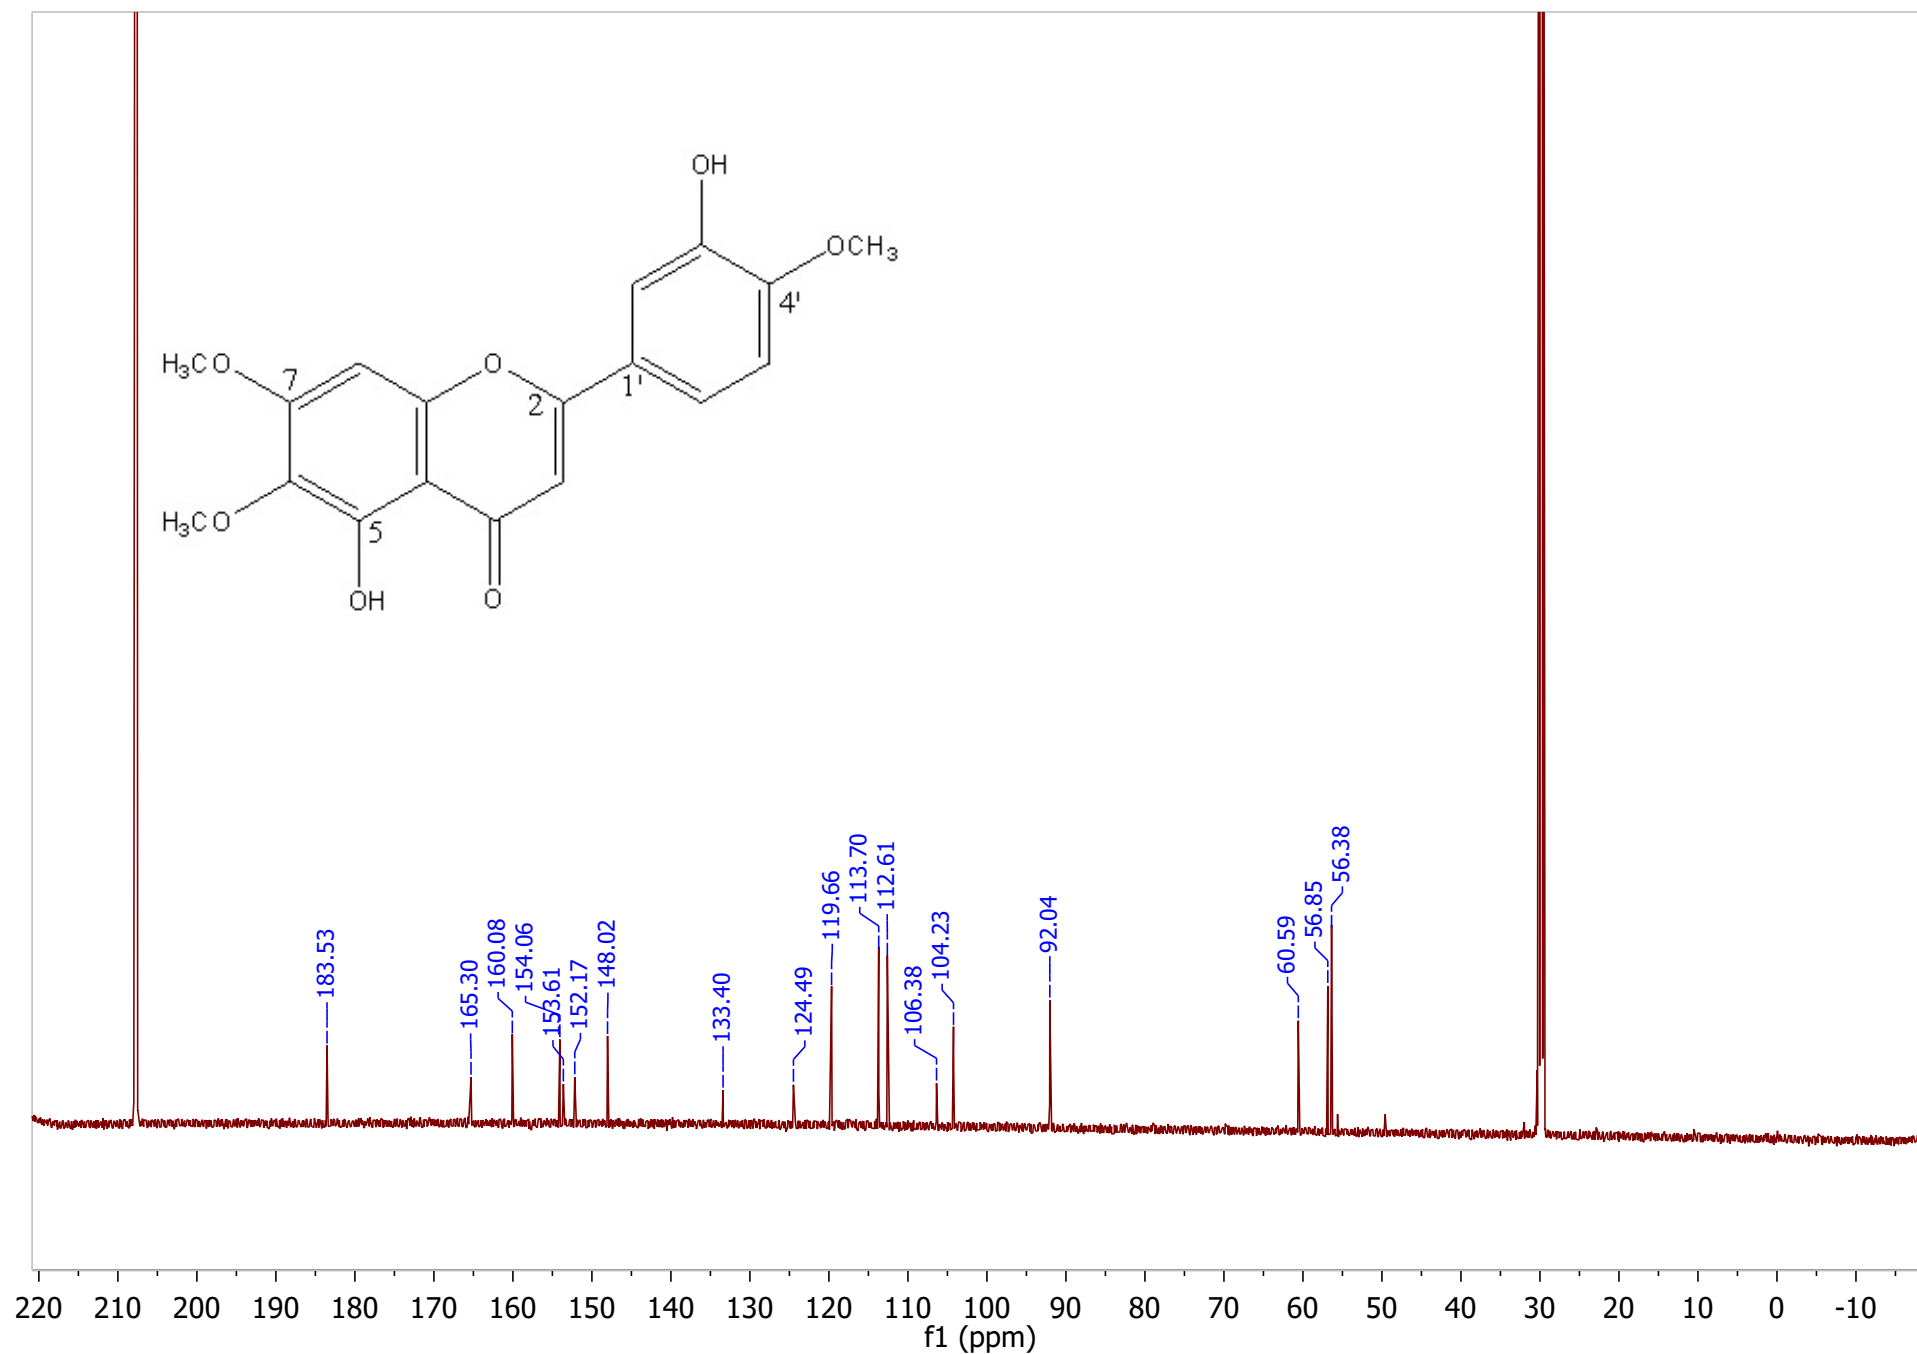

Figure S14.  $^{13}\text{C}$  NMR ( $\text{CD}_3\text{COCD}_3$ , 150 MHz) of eupatorin (**3**)

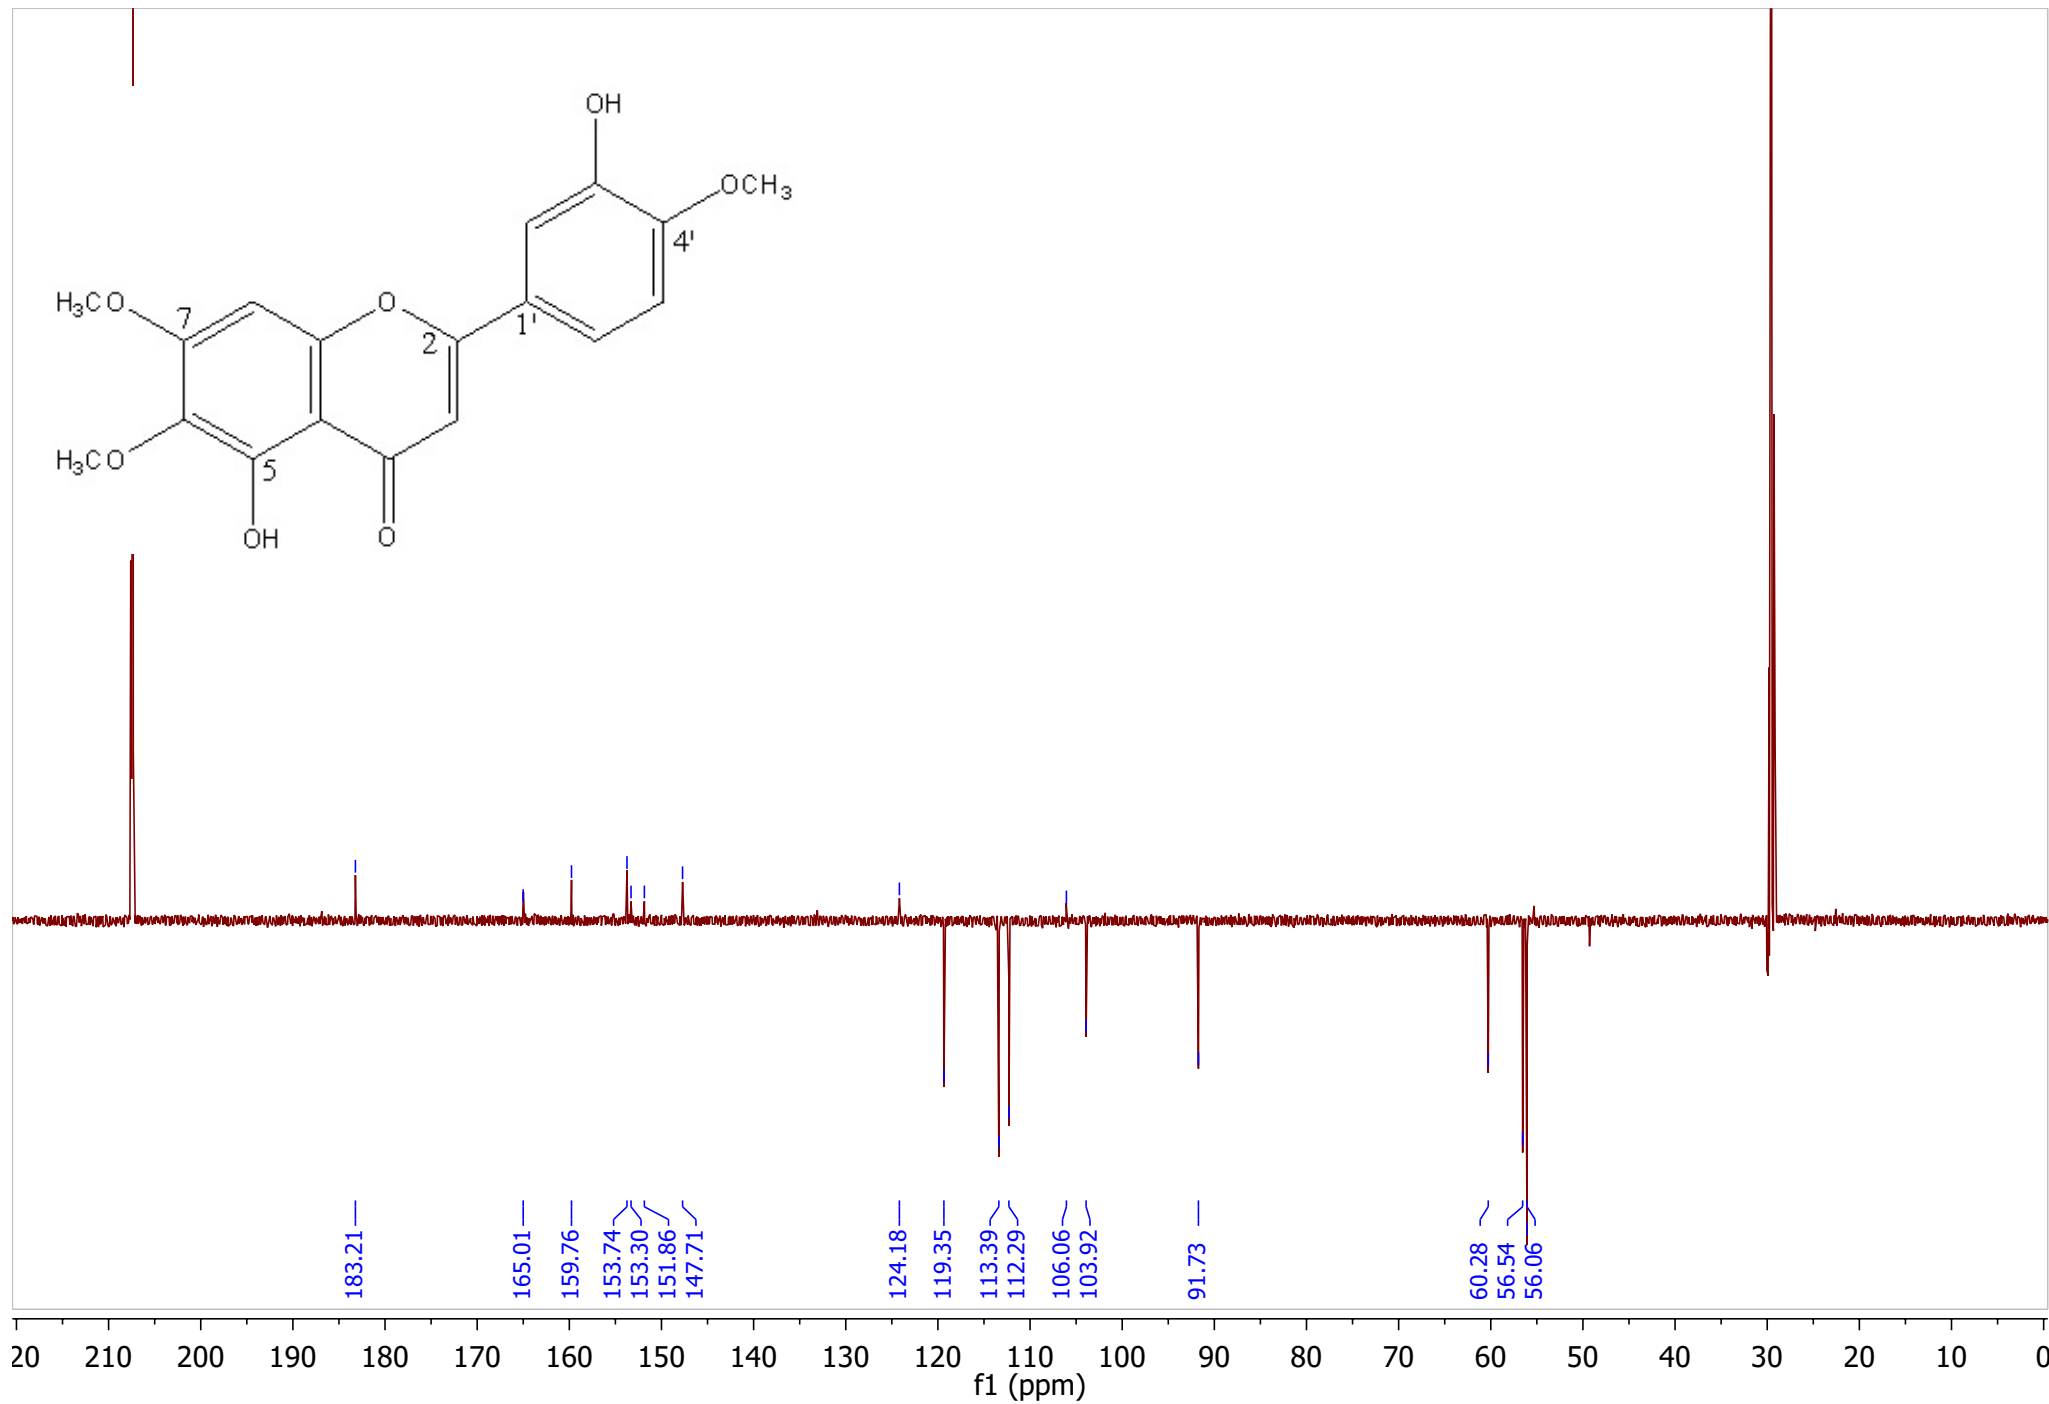

Figure S15.  $^{13}\text{C}$ (DEPT) NMR ( $\text{CD}_3\text{COCD}_3$ , 150 MHz) of eupatorin (**3**)



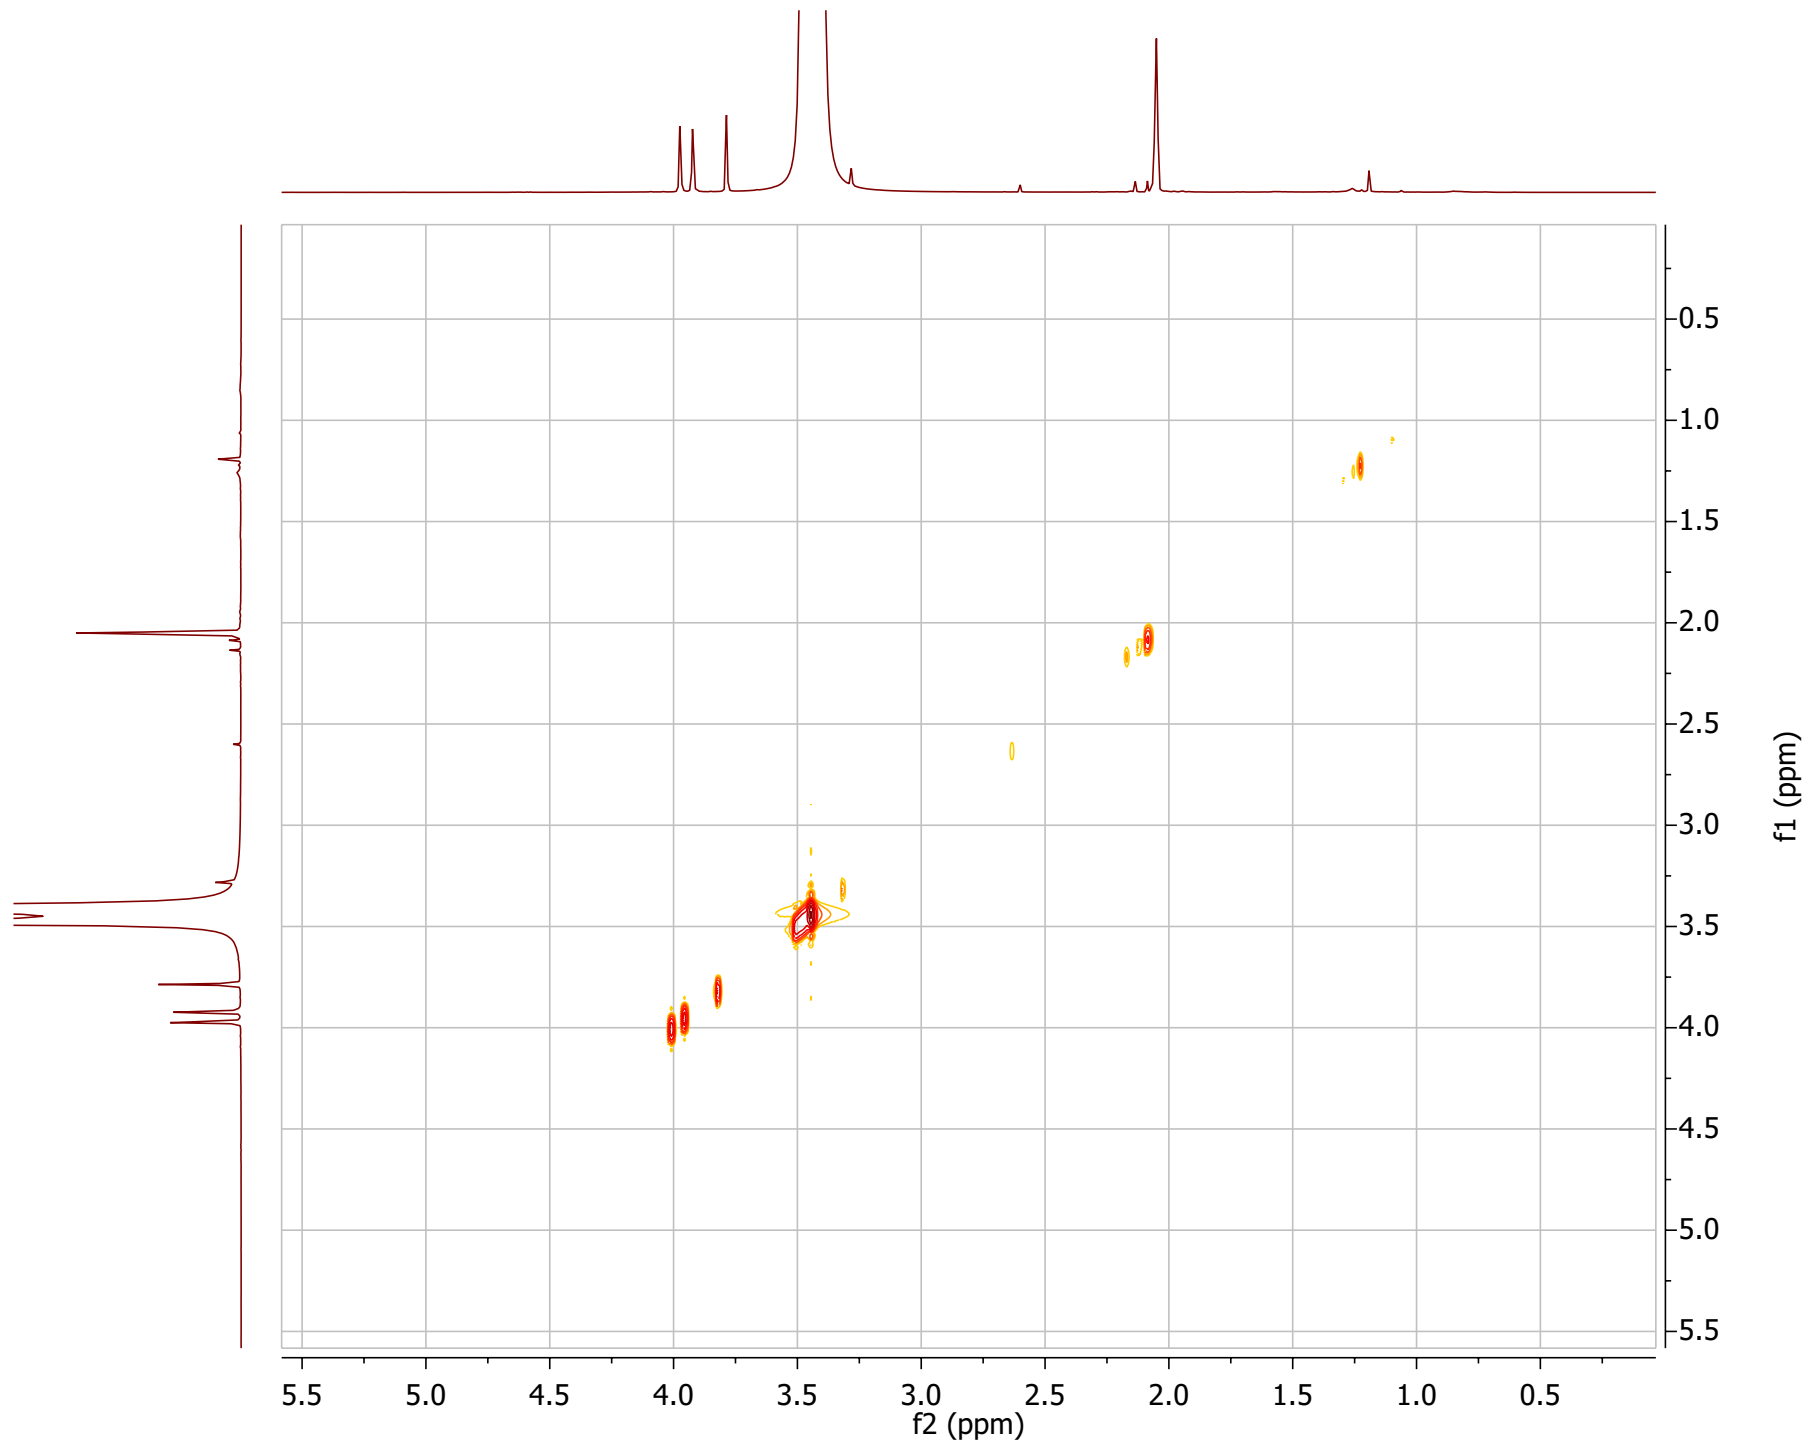

Figure S16.  $^1\text{H}$ - $^1\text{H}$  COSY NMR ( $\text{CD}_3\text{COCD}_3$ , 600 MHz) de eupatorin (**3**)

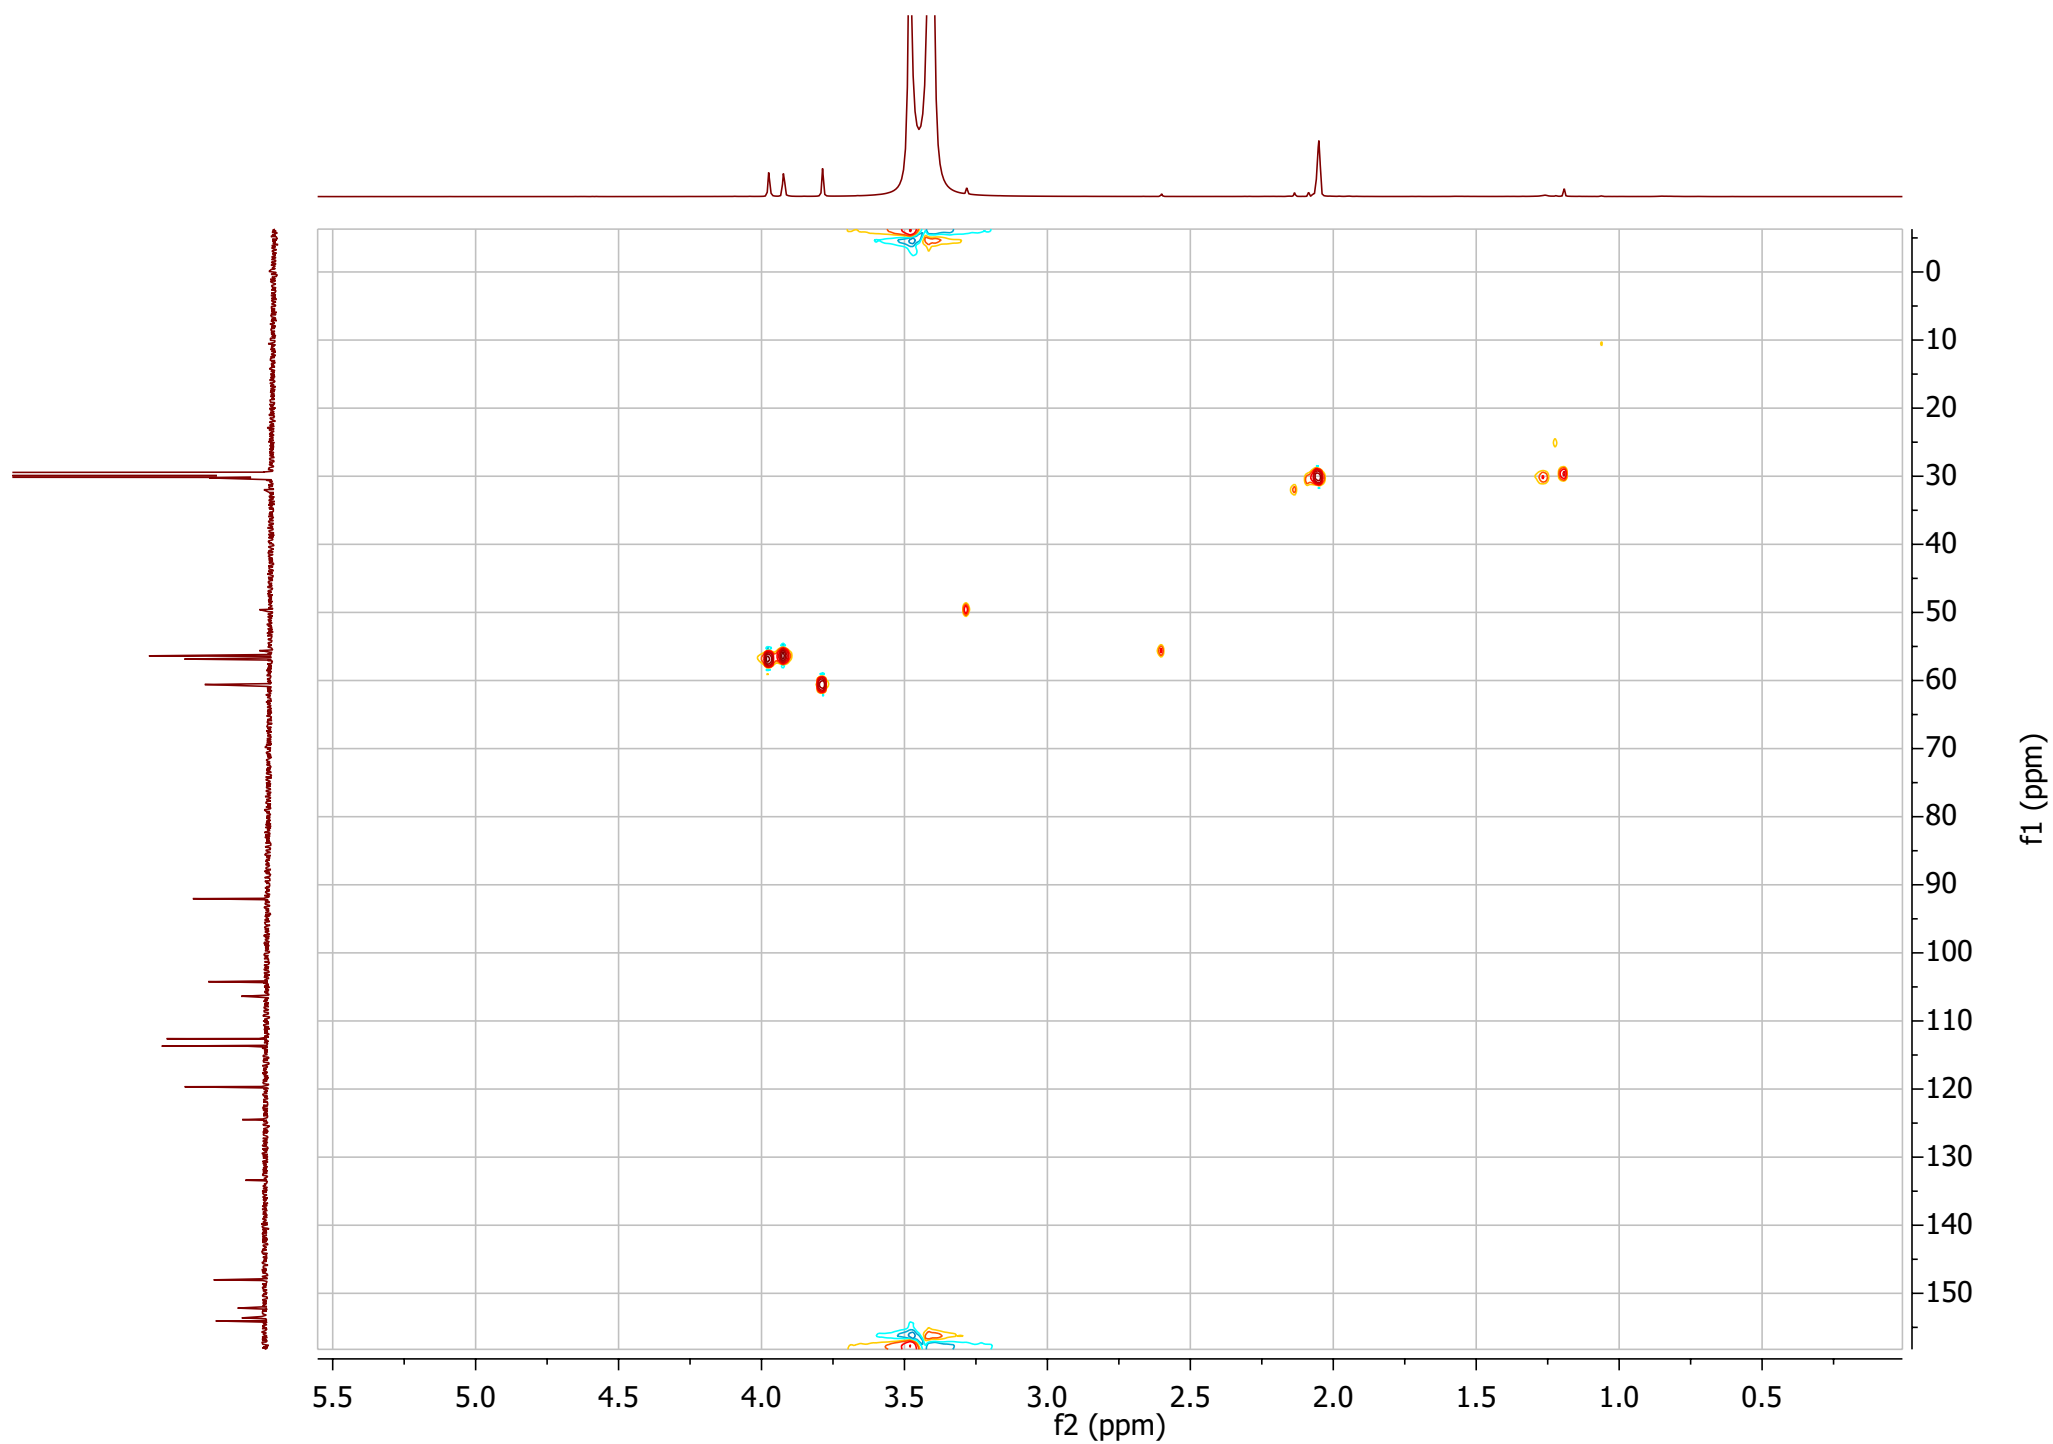

Figure S17.  $^1\text{H}$ - $^{13}\text{C}$  (HSQC) NMR ( $\text{CD}_3\text{COCD}_3$ , 600 MHz) de eupatorin (**3**)

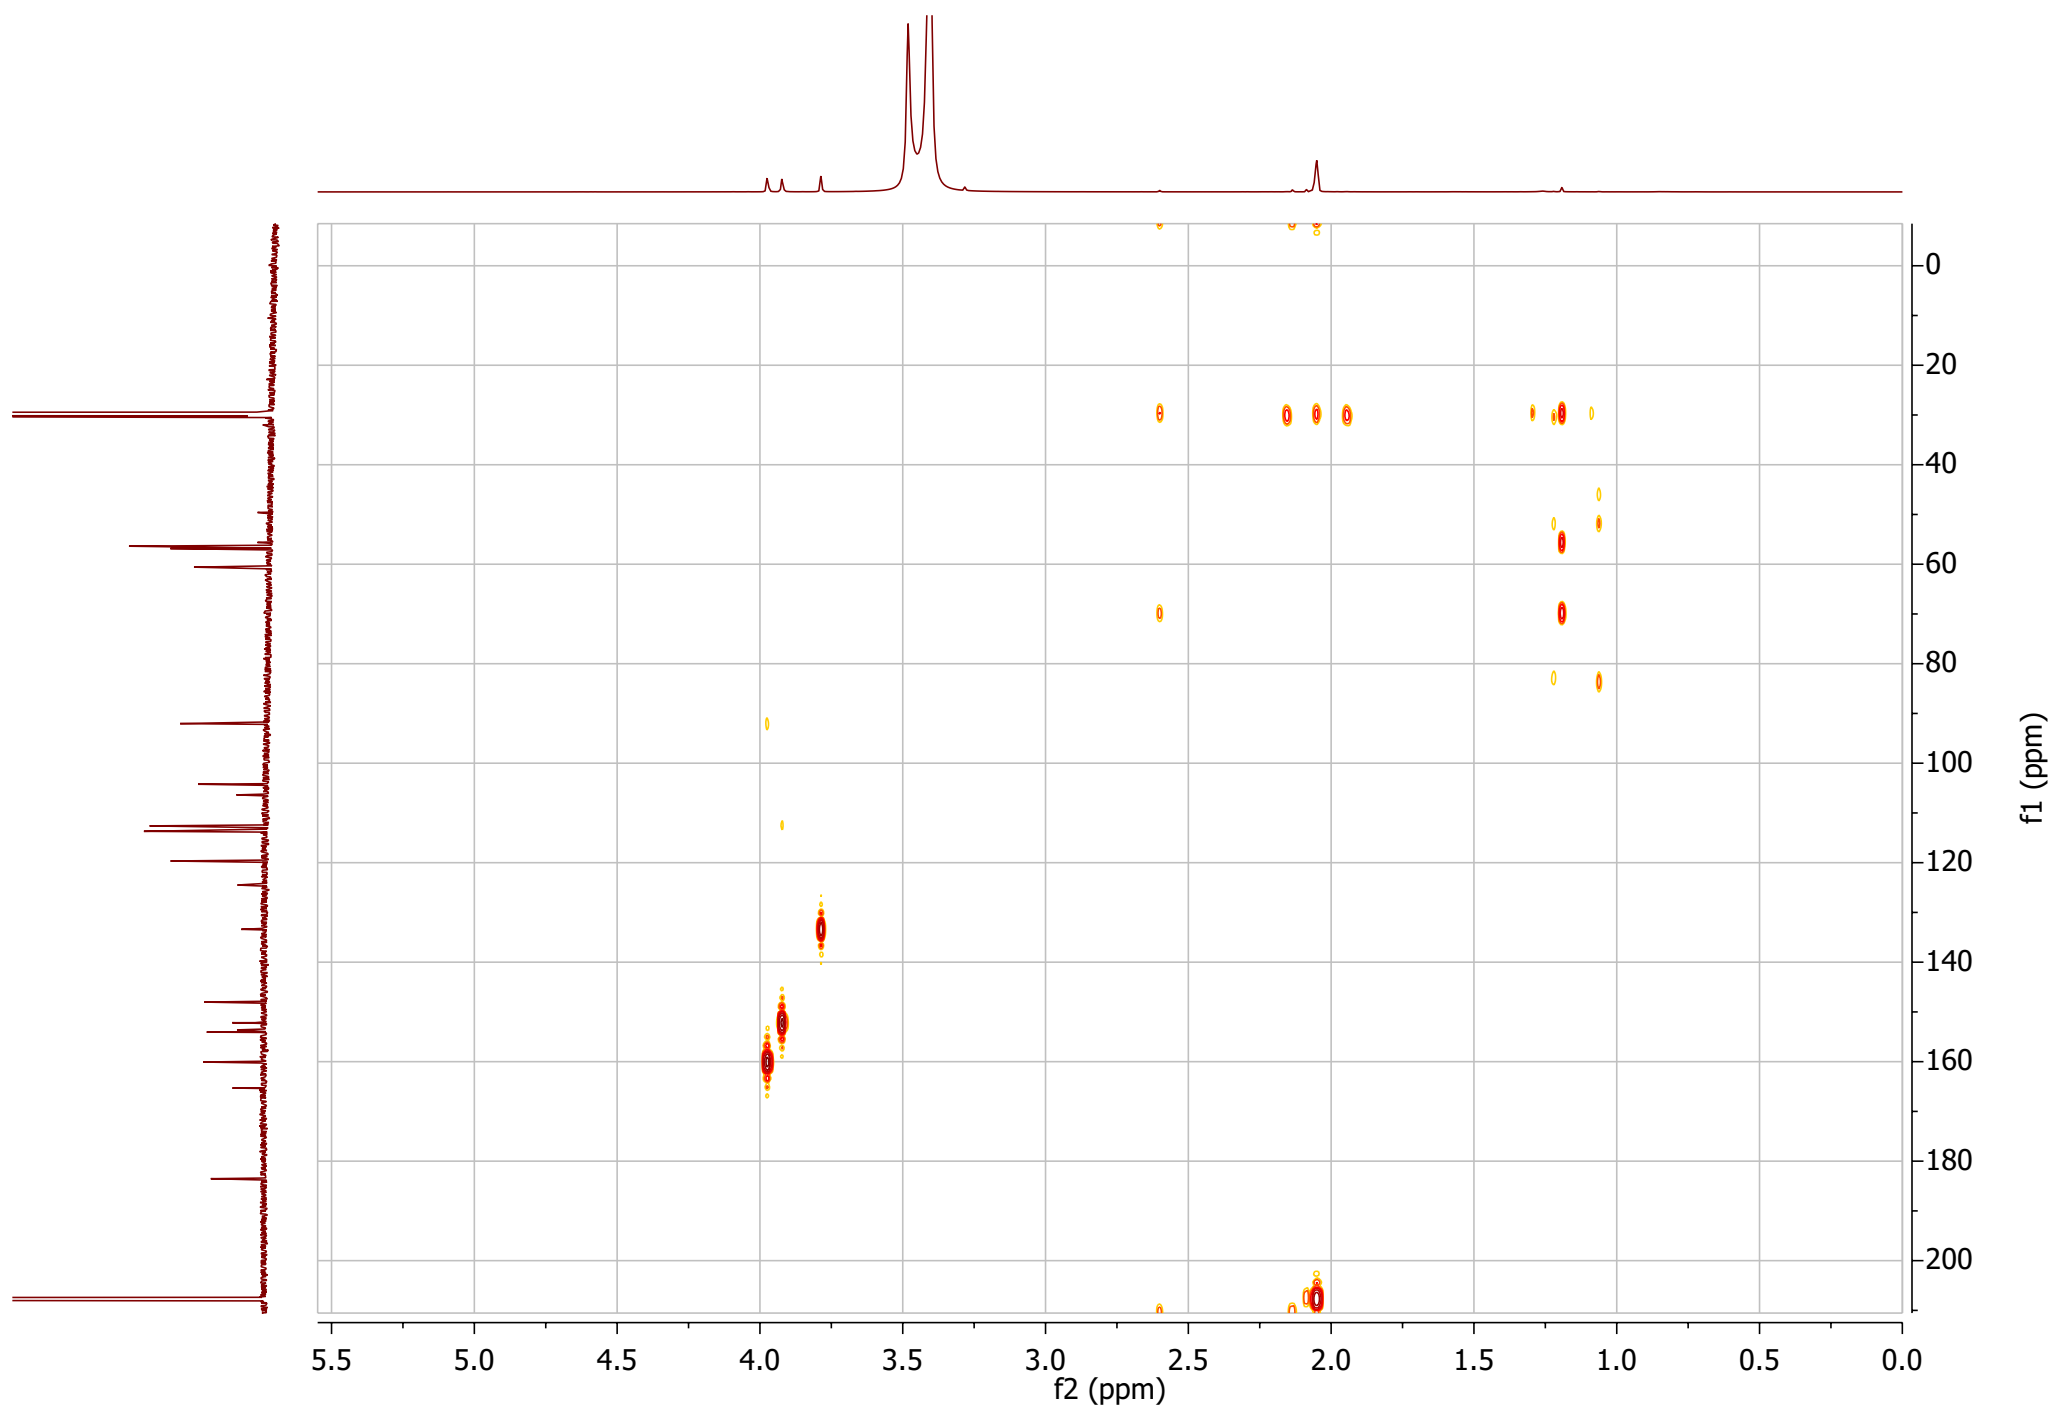

Figure S18.  $^1\text{H}$ - $^{13}\text{C}$  (HMBC) NMR ( $\text{CD}_3\text{COCD}_3$ , 600 MHz) de eupatorin (**3**)
